# Supplementary material for: Antiviral Activity of Anthranilamide Peptidomimetics against Herpes Simplex Virus 1 and a Coronavirus
Source: Preprints.org preprint supplement (doi:10.20944/preprints202308.2017.v1), 2023-08-30

The Supplementary Data for-

Antiviral Activity of Anthranilamide Peptidomimetics against herpes simplex virus 1 and a coronavirus

Umme Laila Urmi1*, Samuel Attard2, Ajay Kumar Vijay1, Mark D. P. Willcox1*, Naresh Kumar2, Salequl Islam1,3, Rajesh Kuppusamy1,2

1School of Optometry and Vision Science, University of New South Wales, Sydney, NSW 2052, Australia

2School of Chemistry, University of New South Wales, Sydney, NSW 2052, Australia

3Department of Microbiology, Jahangirnagar University, Savar, Dhaka-1342, Bangladesh

**Contents**

[1H NMR spectra of (*S*)-*N*-(2-((1-((2-aminoethyl)amino)-3-(1*H*-indol-3-yl)-1-oxopropan-2-yl)carbamoyl)phenyl)-2-naphthamide (**1**) 1](#_Toc143514905)

[13C NMR spectra of (*S*)-*N*-(2-((1-((2-aminoethyl)amino)-3-(1*H*-indol-3-yl)-1-oxopropan-2-yl)carbamoyl)phenyl)-2-naphthamide (**1**) 2](#_Toc143514907)

[1H NMR spectra of (*S*)-*N*-(2-((1-((2-aminoethyl)amino)-3-(*1H*-indol-3-yl)-1-oxopropan-2-yl)carbamoyl)-4-fluorophenyl)-2-naphthamide (**2**) 3](#_Toc143514908)

[13C NMR spectra of (*S*)-*N*-(2-((1-((2-aminoethyl)amino)-3-(*1H*-indol-3-yl)-1-oxopropan-2-yl)carbamoyl)-4-fluorophenyl)-2-naphthamide (**2**) 5](#_Toc143514909)

[1H NMR spectra of (*S*)-*N*-(2-((1-((2-aminoethyl)amino)-3-(*1H*-indol-3-yl)-1-oxopropan-2-yl)carbamoyl)-4-chlorophenyl)-2-naphthamide (**3**) 6](#_Toc143514910)

[13C NMR spectra of (*S*)-*N*-(2-((1-((2-aminoethyl)amino)-3-(*1H*-indol-3-yl)-1-oxopropan-2-yl)carbamoyl)-4-chlorophenyl)-2-naphthamide (**3**) 7](#_Toc143514911)

[1H NMR spectra of (*S*)-*N*-(2-((1-((2-aminoethyl)amino)-3-(*1H*-indol-3-yl)-1-oxopropan-2-yl)carbamoyl)-4-bromophenyl)-2-naphthamide (**4**) 8](#_Toc143514912)

[13C NMR spectra of (*S*)-*N*-(2-((1-((2-aminoethyl)amino)-3-(1*H*-indol-3-yl)-1-oxopropan-2-yl)carbamoyl)-4-bromophenyl)-2-naphthamide (**4**) 9](#_Toc143514913)

[1H NMR spectra of (*S*)-*N*-(2-((1-((2-aminoethyl)amino)-3-(*1H*-indol-3-yl)-1-oxopropan-2-yl)carbamoyl)-4-methoxyphenyl)-2-naphthamide (**5**) 10](#_Toc143514914)

[13C NMR spectra of (*S*)-*N*-(2-((1-((2-aminoethyl)amino)-3-(*1H*-indol-3-yl)-1-oxopropan-2-yl)carbamoyl)-4-methoxyphenyl)-2-naphthamide (**5**) 11](#_Toc143514915)

[1H NMR spectra of (*S*)-*N*-(2-((1-((2-guanidinoethyl)amino)-3-(*1H*-indol-3-yl)-1-oxopropan-2-yl)carbamoyl)phenyl)-2-naphthamide (**6**) 12](#_Toc143514916)

[13C NMR spectra of (*S*)-*N*-(2-((1-((2-guanidinoethyl)amino)-3-(*1H*-indol-3-yl)-1-oxopropan-2-yl)carbamoyl)phenyl)-2-naphthamide (**6**) 13](#_Toc143514917)

[1H NMR spectra of (*S*)-*N*-(4-fluoro-2-((1-((2-guanidinoethyl)amino)-3-(*1H*-indol-3-yl)-1-oxopropan-2-yl)carbamoyl)phenyl)-2-naphthamide (**7**) 14](#_Toc143514918)

[13C NMR spectra of (*S*)-*N*-(4-fluoro-2-((1-((2-guanidinoethyl)amino)-3-(*1H*-indol-3-yl)-1-oxopropan-2-yl)carbamoyl)phenyl)-2-naphthamide (**7**) 15](#_Toc143514919)

[1H NMR spectra of (*S*)-*N*-(4-chloro-2-((1-((2-guanidinoethyl)amino)-3-(*1H*-indol-3-yl)-1-oxopropan-2-yl)carbamoyl)phenyl)-2-naphthamide(**8**) 16](#_Toc143514920)

[13C NMR spectra of (*S*)-*N*-(4-chloro-2-((1-((2-guanidinoethyl)amino)-3-(*1H*-indol-3-yl)-1-oxopropan-2-yl)carbamoyl)phenyl)-2-naphthamide(**8**) 17](#_Toc143514921)

[1H NMR spectra of (*S*)-*N*-(4-bromo-2-((1-((2-guanidinoethyl)amino)-3-(1*H*-indol-3-yl)-1-oxopropan-2-yl)carbamoyl)phenyl)-2-naphthamide (**9**) 18](#_Toc143514922)

[13C NMR spectra of (*S*)-*N*-(4-bromo-2-((1-((2-guanidinoethyl)amino)-3-(1*H*-indol-3-yl)-1-oxopropan-2-yl)carbamoyl)phenyl)-2-naphthamide (**9**) 19](#_Toc143514923)

[1H NMR spectra of (*S*)-*N*-(2-((1-((2-guanidinoethyl)amino)-3-(*1H*-indol-3-yl)-1-oxopropan-2-yl)carbamoyl)-4-methoxyphenyl)-2-naphthamide (**10**) 20](#_Toc143514924)

[13C NMR spectra of (*S*)-*N*-(2-((1-((2-guanidinoethyl)amino)-3-(*1H*-indol-3-yl)-1-oxopropan-2-yl)carbamoyl)-4-methoxyphenyl)-2-naphthamide (**10**) 21](#_Toc143514925)

[1H NMR of (*S*)-2-amino-*N*-(1-((2-aminoethyl)amino)-3-(1*H*-indol-3-yl)-1-oxopropan-2-yl)-5-(naphthalen-2-yl)benzamide (**11**) 22](#_Toc143514926)

[13C NMR of (*S*)-2-amino-*N*-(1-((2-aminoethyl)amino)-3-(1*H*-indol-3-yl)-1-oxopropan-2-yl)-5-(naphthalen-2-yl)benzamide (**11**) 23](#_Toc143514926)

[1HNMR of (S)-4-amino-N-(1-((2-aminoethyl)amino)-3-(1H-indol-3-yl)-1-oxopropan-2-yl)-[1,1':4',1''-terphenyl]-3-carboxamide (**12**) 24](#_Toc143514927)

[13C NMR of (S)-4-amino-N-(1-((2-aminoethyl)amino)-3-(1H-indol-3-yl)-1-oxopropan-2-yl)-[1,1':4',1''-terphenyl]-3-carboxamide (**12**) 25](#_Toc143514928)

1H NMR spectra of (S)-2-amino-N-(1-((2-aminoethyl)amino)-3-(1H-indol-3-yl)-1-oxopropan-2-yl)-5-(2,4-dimethoxypyrimidin-5-yl)benzamide (**13**)………………………26

13C NMR spectra of (S)-2-amino-N-(1-((2-aminoethyl)amino)-3-(1H-indol-3-yl)-1-oxopropan-2-yl)-5-(2,4-dimethoxypyrimidin-5-yl)benzamide (**13**)………………….27

1H NMR spectra of (S)-4-amino-N-(1-((2-aminoethyl)amino)-3-(1H-indol-3-yl)-1-oxopropan-2-yl)-[1,1':2',1''-terphenyl]-3-carboxamide (**14**)……………………………….28

13C NMR spectra of(S)-4-amino-N-(1-((2-aminoethyl)amino)-3-(1H-indol-3-yl)-1-oxopropan-2-yl)-[1,1':2',1''-terphenyl]-3-carboxamide (**14**)…………………………………29

[1H NMR of *N*-(4-bromo-2-(((*S*)-1-((2-((*S*)-2,6-diaminohexanamido)ethyl)amino)-3-(1*H*-indol-3-yl)-1-oxopropan-2-yl)carbamoyl)phenyl)-2-naphthamide (**15**………..30](#_Toc143514930)

13C NMR of *N*-(4-bromo-2-(((S)-1-((2-((S)-2,6-diaminohexanamido)ethyl)amino)-3-(1*H*-indol-3-yl)-1-oxopropan-2-yl)carbamoyl)phenyl)-2-naphthamide (**15**)………..31

1HNMR of *N*-(4-bromo-2-(((S)-1-((2-((S)-2,6-diaminohexanamido)ethyl)amino)-3-(1*H*-indol-3-yl)-1-oxopropan-2-yl)carbamoyl)phenyl)-[1,1'-biphenyl]-3-carboxamide (**16**)..32

13C NMR of *N*-(4-bromo-2-(((S)-1-((2-((S)-2,6-diaminohexanamido)ethyl)amino)-3-(1*H*-indol-3-yl)-1-oxopropan-2-yl)carbamoyl)phenyl)-[1,1'-biphenyl]-3-carboxamide (**16**).33

1H NMR of *N*-(4-bromo-2-(((S)-1-((2-((S)-2,6-diaminohexanamido)ethyl)amino)-3-(1*H*-indol-3-yl)-1-oxopropan-2-yl)carbamoyl)phenyl)-[1,1'-biphenyl]-4-carboxamide (**17**).34

13C NMR of *N*-(4-bromo-2-(((S)-1-((2-((S)-2,6-diaminohexanamido)ethyl)amino)-3-(1*H*-indol-3-yl)-1-oxopropan-2-yl)carbamoyl)phenyl)-[1,1'-biphenyl]-4-carboxamide (**17**).35

1H NMR spectra of (*S*)-*N*-(2-((1-((2-aminoethyl)amino)-3-(1*H*-indol-3-yl)-1-oxopropan-2-yl)carbamoyl)phenyl)-2-naphthamide (**1**)


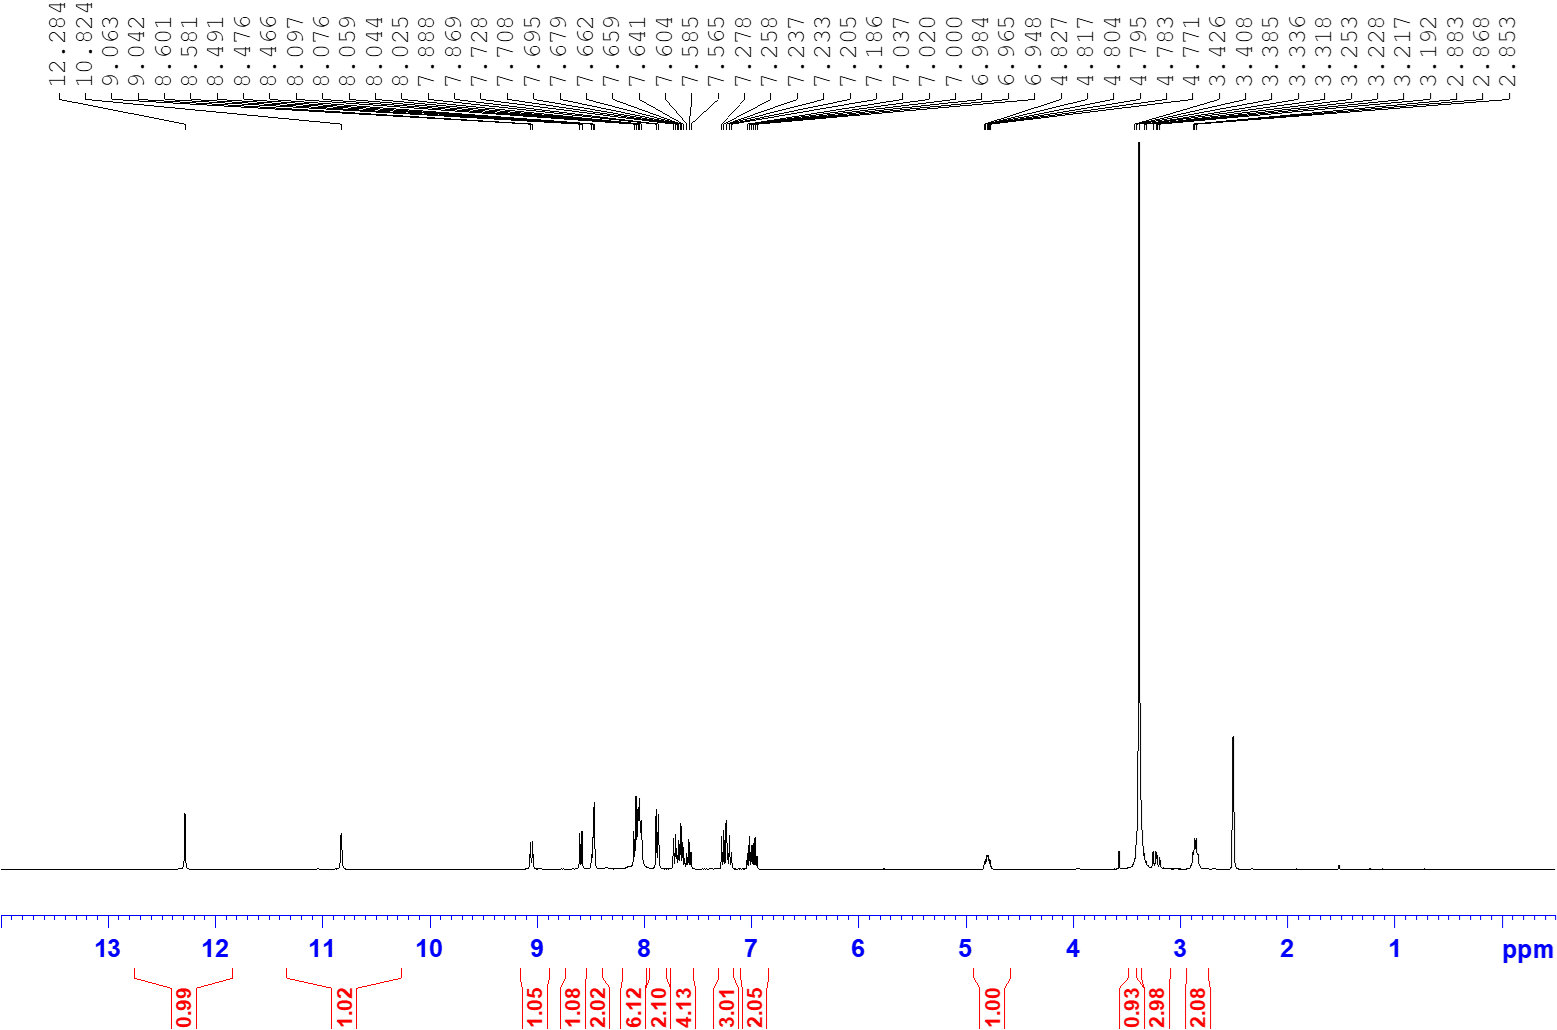


13C NMR spectra of (*S*)-*N*-(2-((1-((2-aminoethyl)amino)-3-(1*H*-indol-3-yl)-1-oxopropan-2-yl)carbamoyl)phenyl)-2-naphthamide (**1**)

1H NMR spectra of (*S*)-*N*-(2-((1-((2-aminoethyl)amino)-3-(*1H*-indol-3-yl)-1-oxopropan-2-yl)carbamoyl)-4-fluorophenyl)-2-naphthamide (**2**)

13C NMR spectra of (*S*)-*N*-(2-((1-((2-aminoethyl)amino)-3-(*1H*-indol-3-yl)-1-oxopropan-2-yl)carbamoyl)-4-fluorophenyl)-2-naphthamide (**2**)

1H NMR spectra of (*S*)-*N*-(2-((1-((2-aminoethyl)amino)-3-(*1H*-indol-3-yl)-1-oxopropan-2-yl)carbamoyl)-4-chlorophenyl)-2-naphthamide (**3**)

13C NMR spectra of (*S*)-*N*-(2-((1-((2-aminoethyl)amino)-3-(*1H*-indol-3-yl)-1-oxopropan-2-yl)carbamoyl)-4-chlorophenyl)-2-naphthamide (**3**)

1H NMR spectra of (*S*)-*N*-(2-((1-((2-aminoethyl)amino)-3-(*1H*-indol-3-yl)-1-oxopropan-2-yl)carbamoyl)-4-bromophenyl)-2-naphthamide (**4** )

13C NMR spectra of (*S*)-*N*-(2-((1-((2-aminoethyl)amino)-3-(1*H*-indol-3-yl)-1-oxopropan-2-yl)carbamoyl)-4-bromophenyl)-2-naphthamide (**4**)

1H NMR spectra of (*S*)-*N*-(2-((1-((2-aminoethyl)amino)-3-(*1H*-indol-3-yl)-1-oxopropan-2-yl)carbamoyl)-4-methoxyphenyl)-2-naphthamide (**5**)


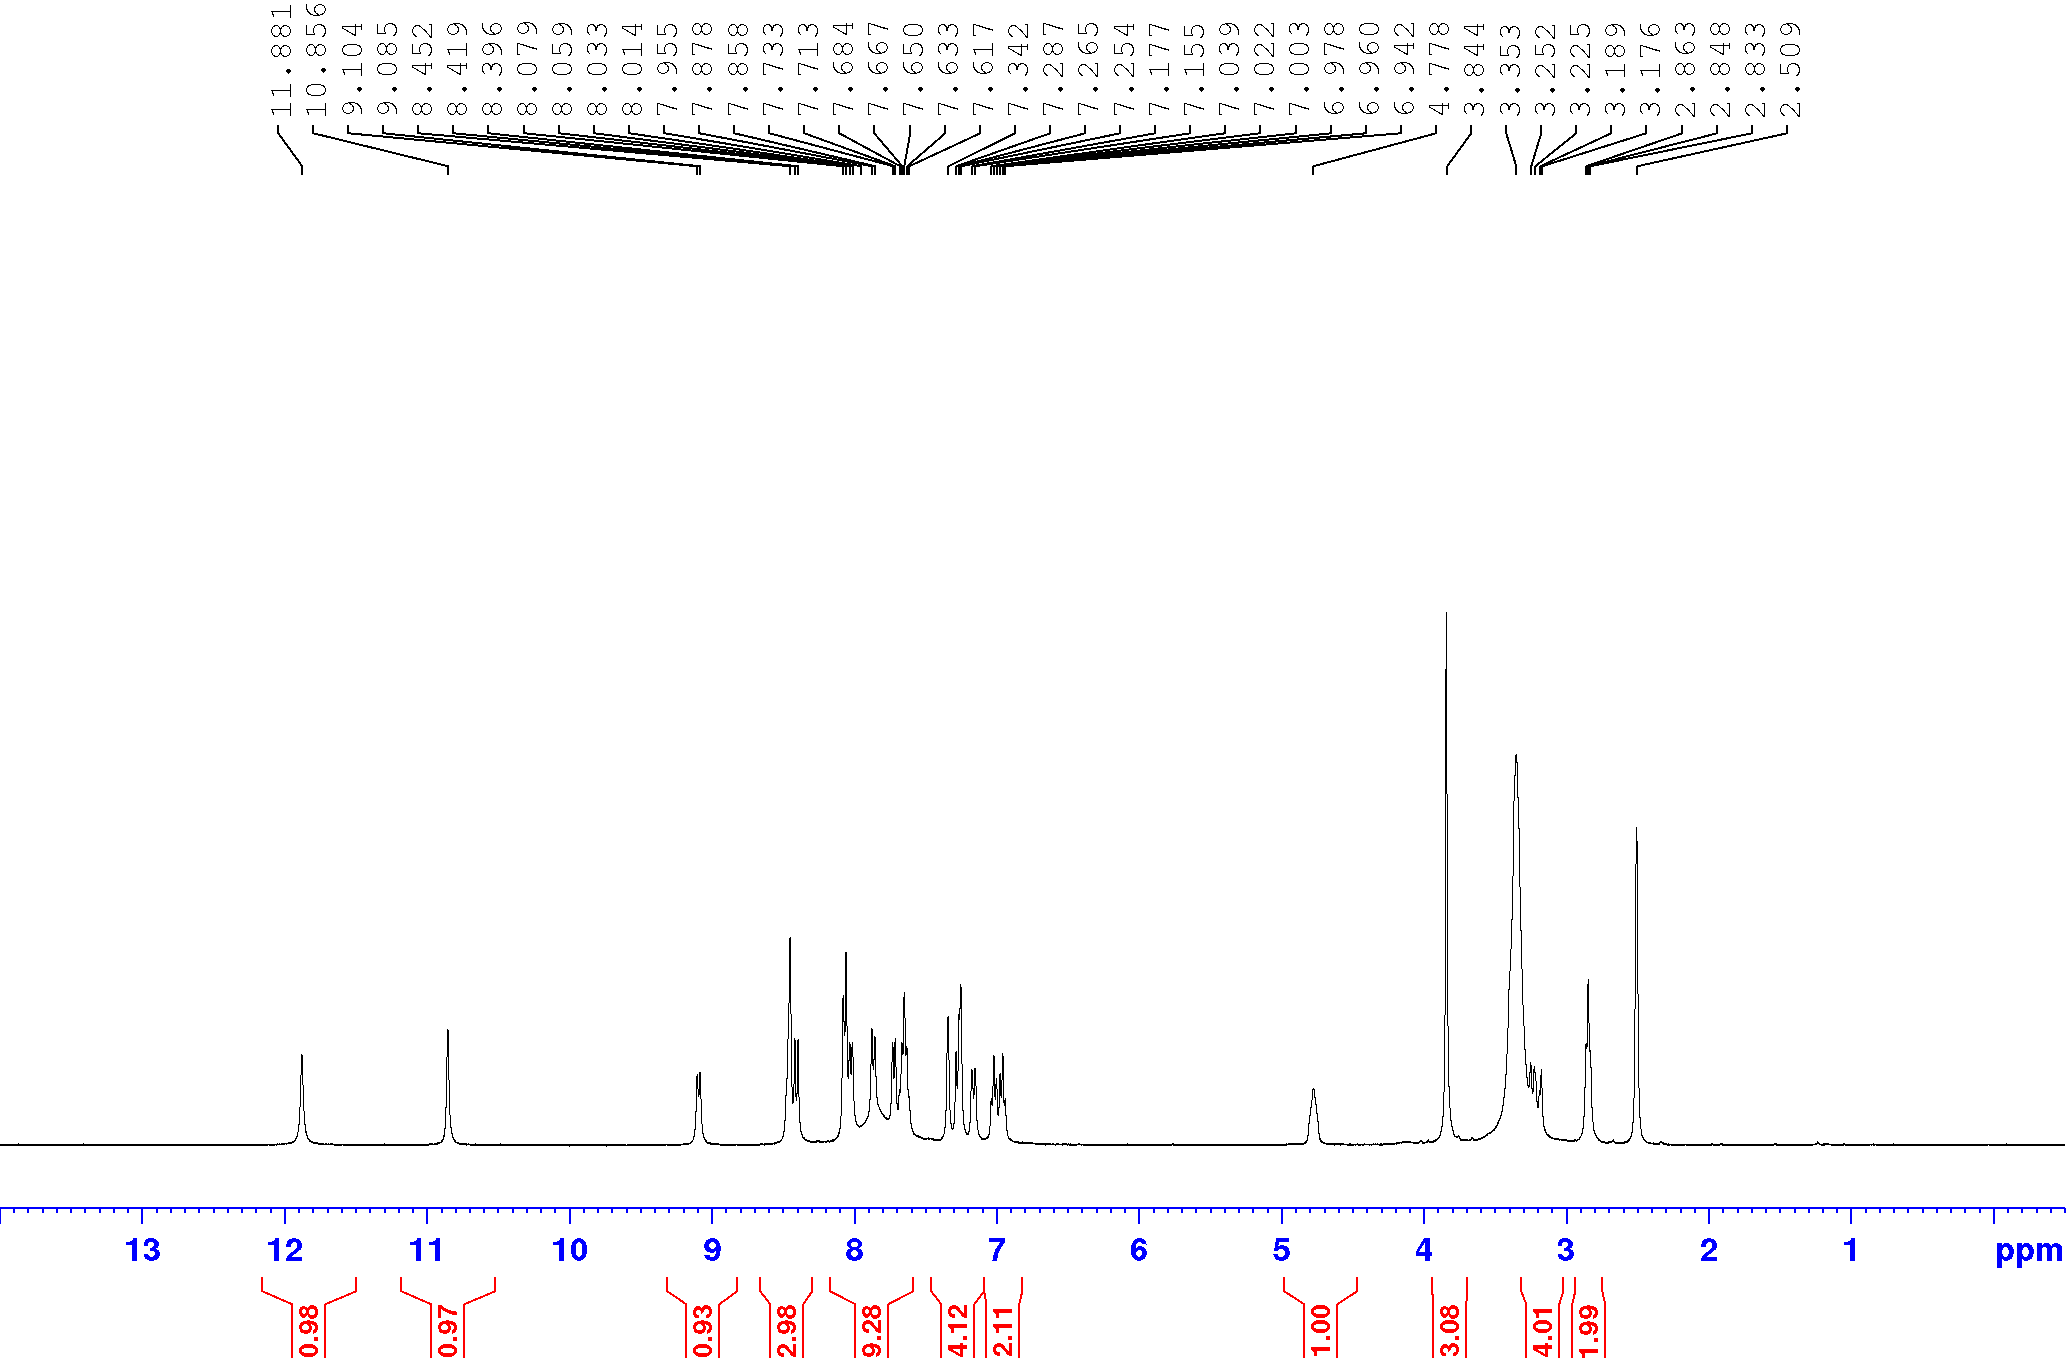


13C NMR spectra of (*S*)-*N*-(2-((1-((2-aminoethyl)amino)-3-(*1H*-indol-3-yl)-1-oxopropan-2-yl)carbamoyl)-4-methoxyphenyl)-2-naphthamide (**5**)


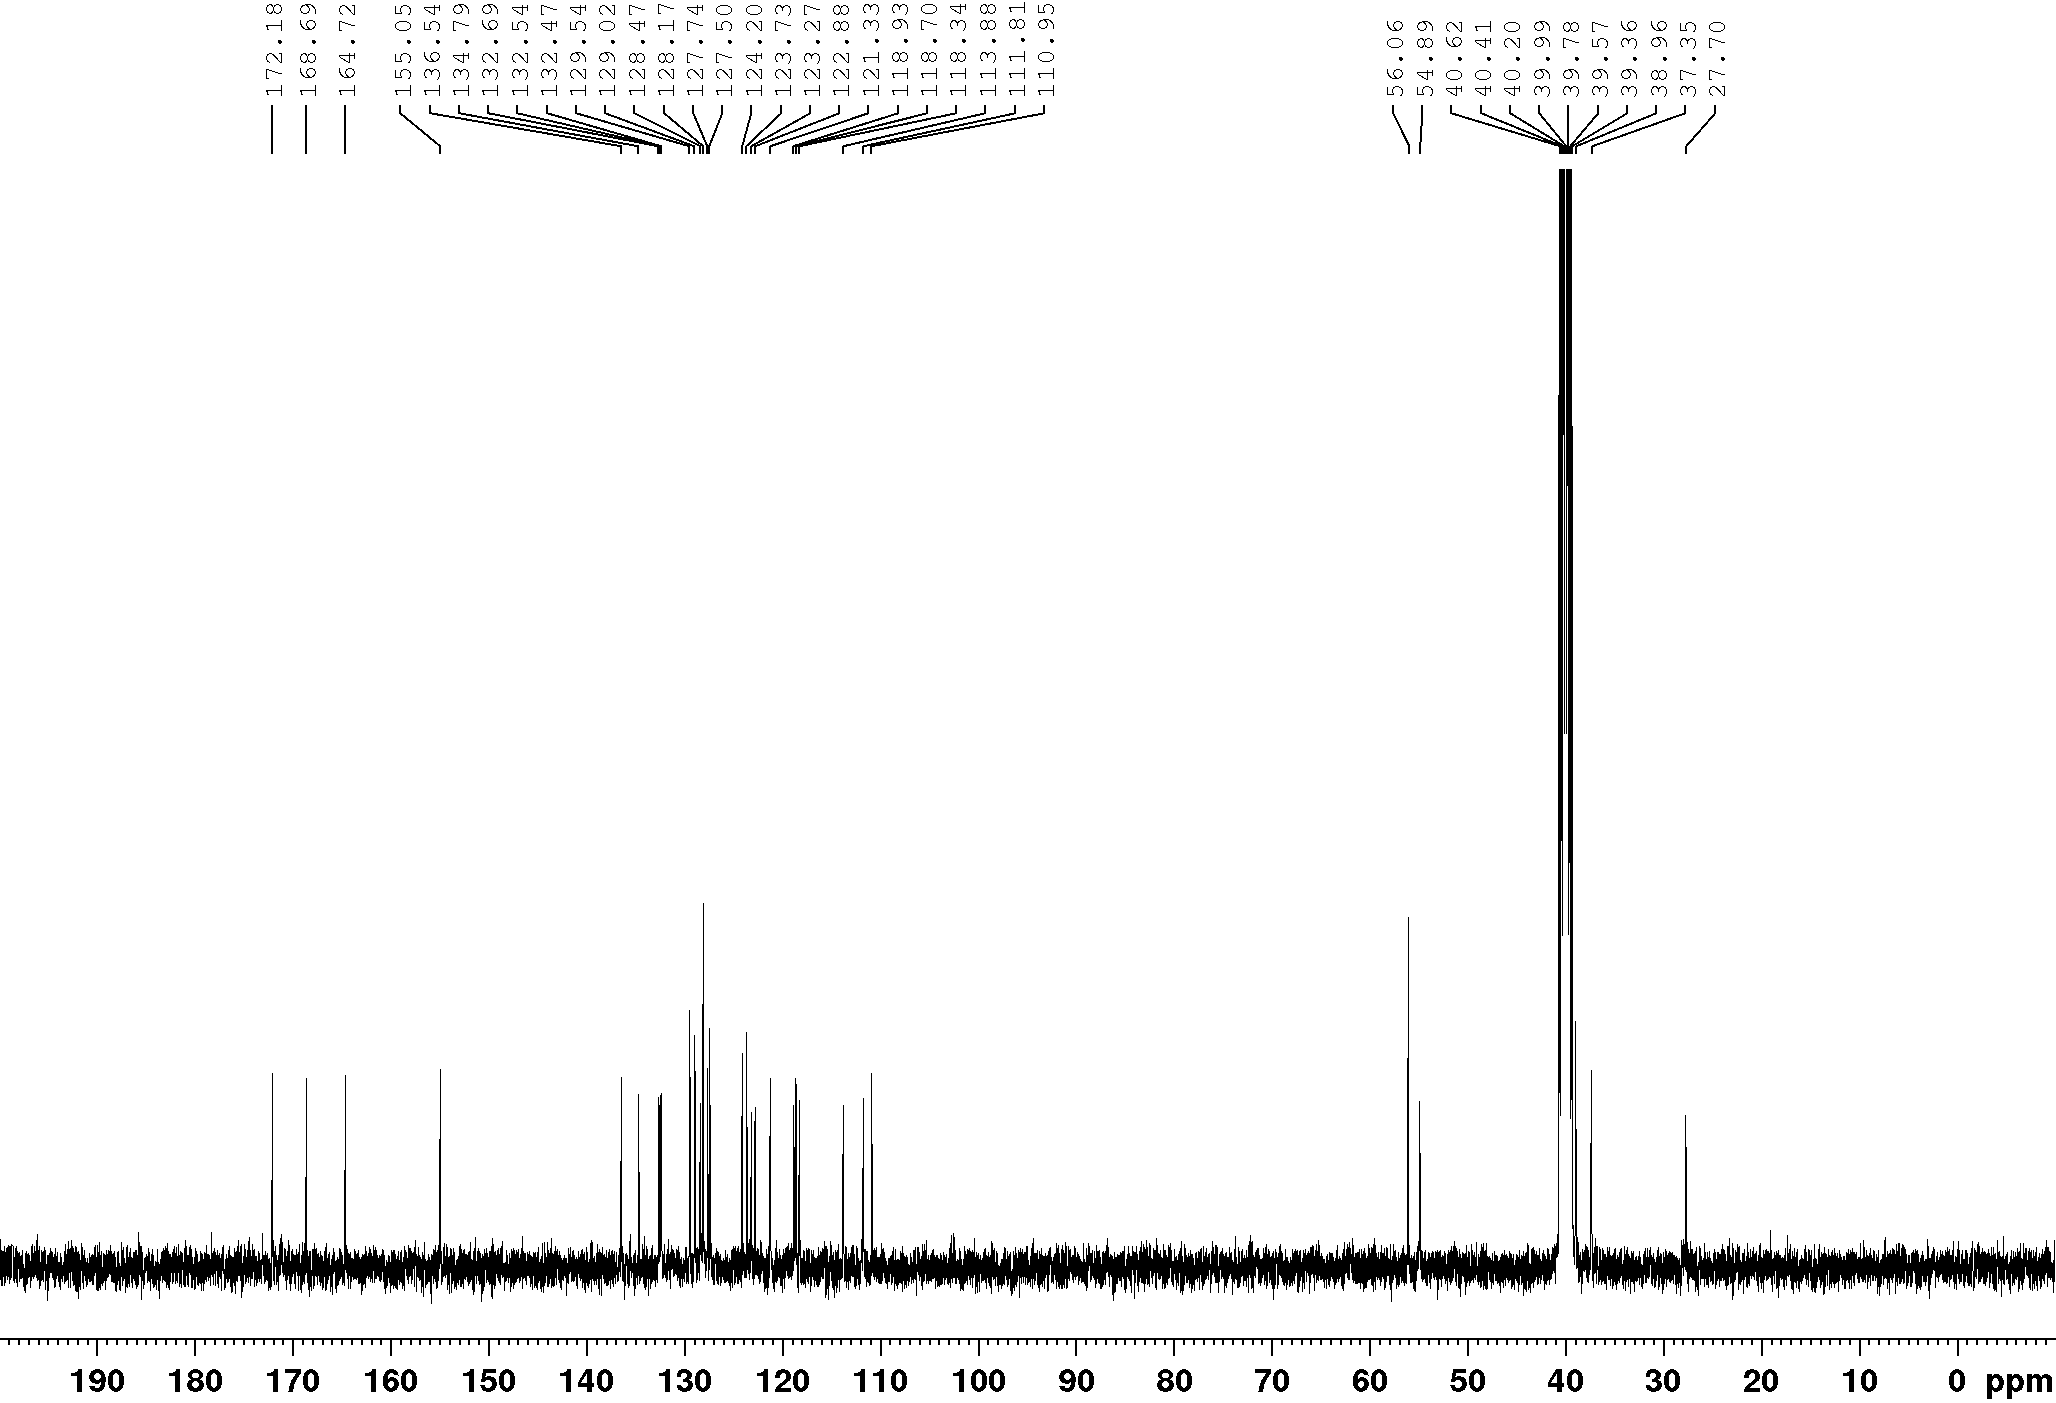


1H NMR spectra of (*S*)-*N*-(2-((1-((2-guanidinoethyl)amino)-3-(*1H*-indol-3-yl)-1-oxopropan-2-yl)carbamoyl)phenyl)-2-naphthamide (**6**)

13C NMR spectra of (*S*)-*N*-(2-((1-((2-guanidinoethyl)amino)-3-(*1H*-indol-3-yl)-1-oxopropan-2-yl)carbamoyl)phenyl)-2-naphthamide (**6**)

1H NMR spectra of (*S*)-*N*-(4-fluoro-2-((1-((2-guanidinoethyl)amino)-3-(*1H*-indol-3-yl)-1-oxopropan-2-yl)carbamoyl)phenyl)-2-naphthamide (**7**)


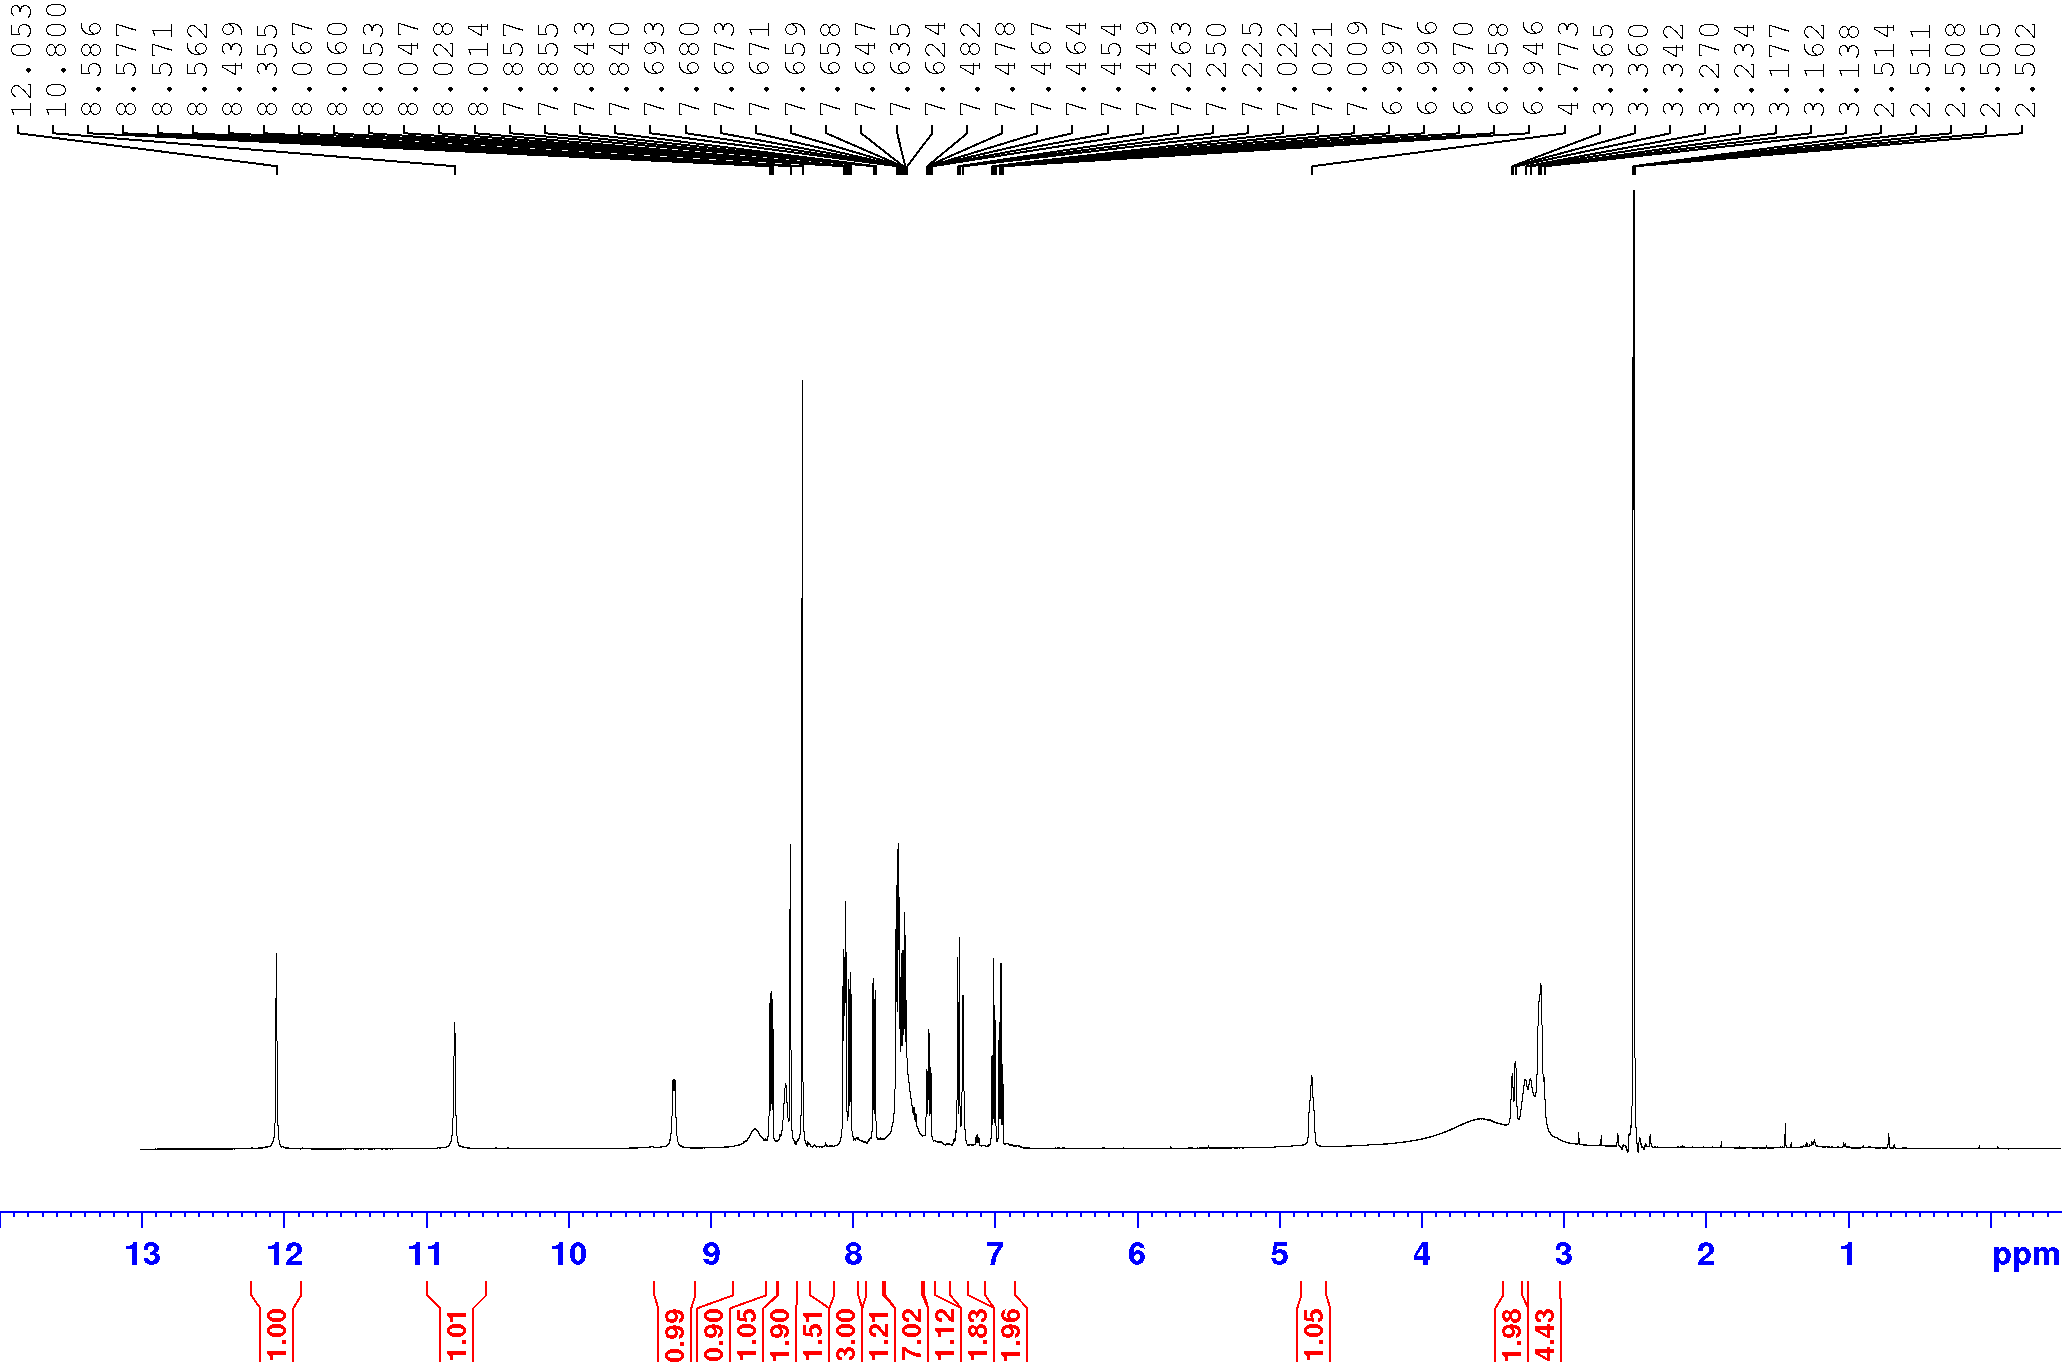


13C NMR spectra of (*S*)-*N*-(4-fluoro-2-((1-((2-guanidinoethyl)amino)-3-(*1H*-indol-3-yl)-1-oxopropan-2-yl)carbamoyl)phenyl)-2-naphthamide (**7**)

1H NMR spectra of (*S*)-*N*-(4-chloro-2-((1-((2-guanidinoethyl)amino)-3-(*1H*-indol-3-yl)-1-oxopropan-2-yl)carbamoyl)phenyl)-2-naphthamide(**8**)

13C NMR spectra of (*S*)-*N*-(4-chloro-2-((1-((2-guanidinoethyl)amino)-3-(*1H*-indol-3-yl)-1-oxopropan-2-yl)carbamoyl)phenyl)-2-naphthamide(**8**)

1H NMR spectra of (*S*)-*N*-(4-bromo-2-((1-((2-guanidinoethyl)amino)-3-(1*H*-indol-3-yl)-1-oxopropan-2-yl)carbamoyl)phenyl)-2-naphthamide (**9**)


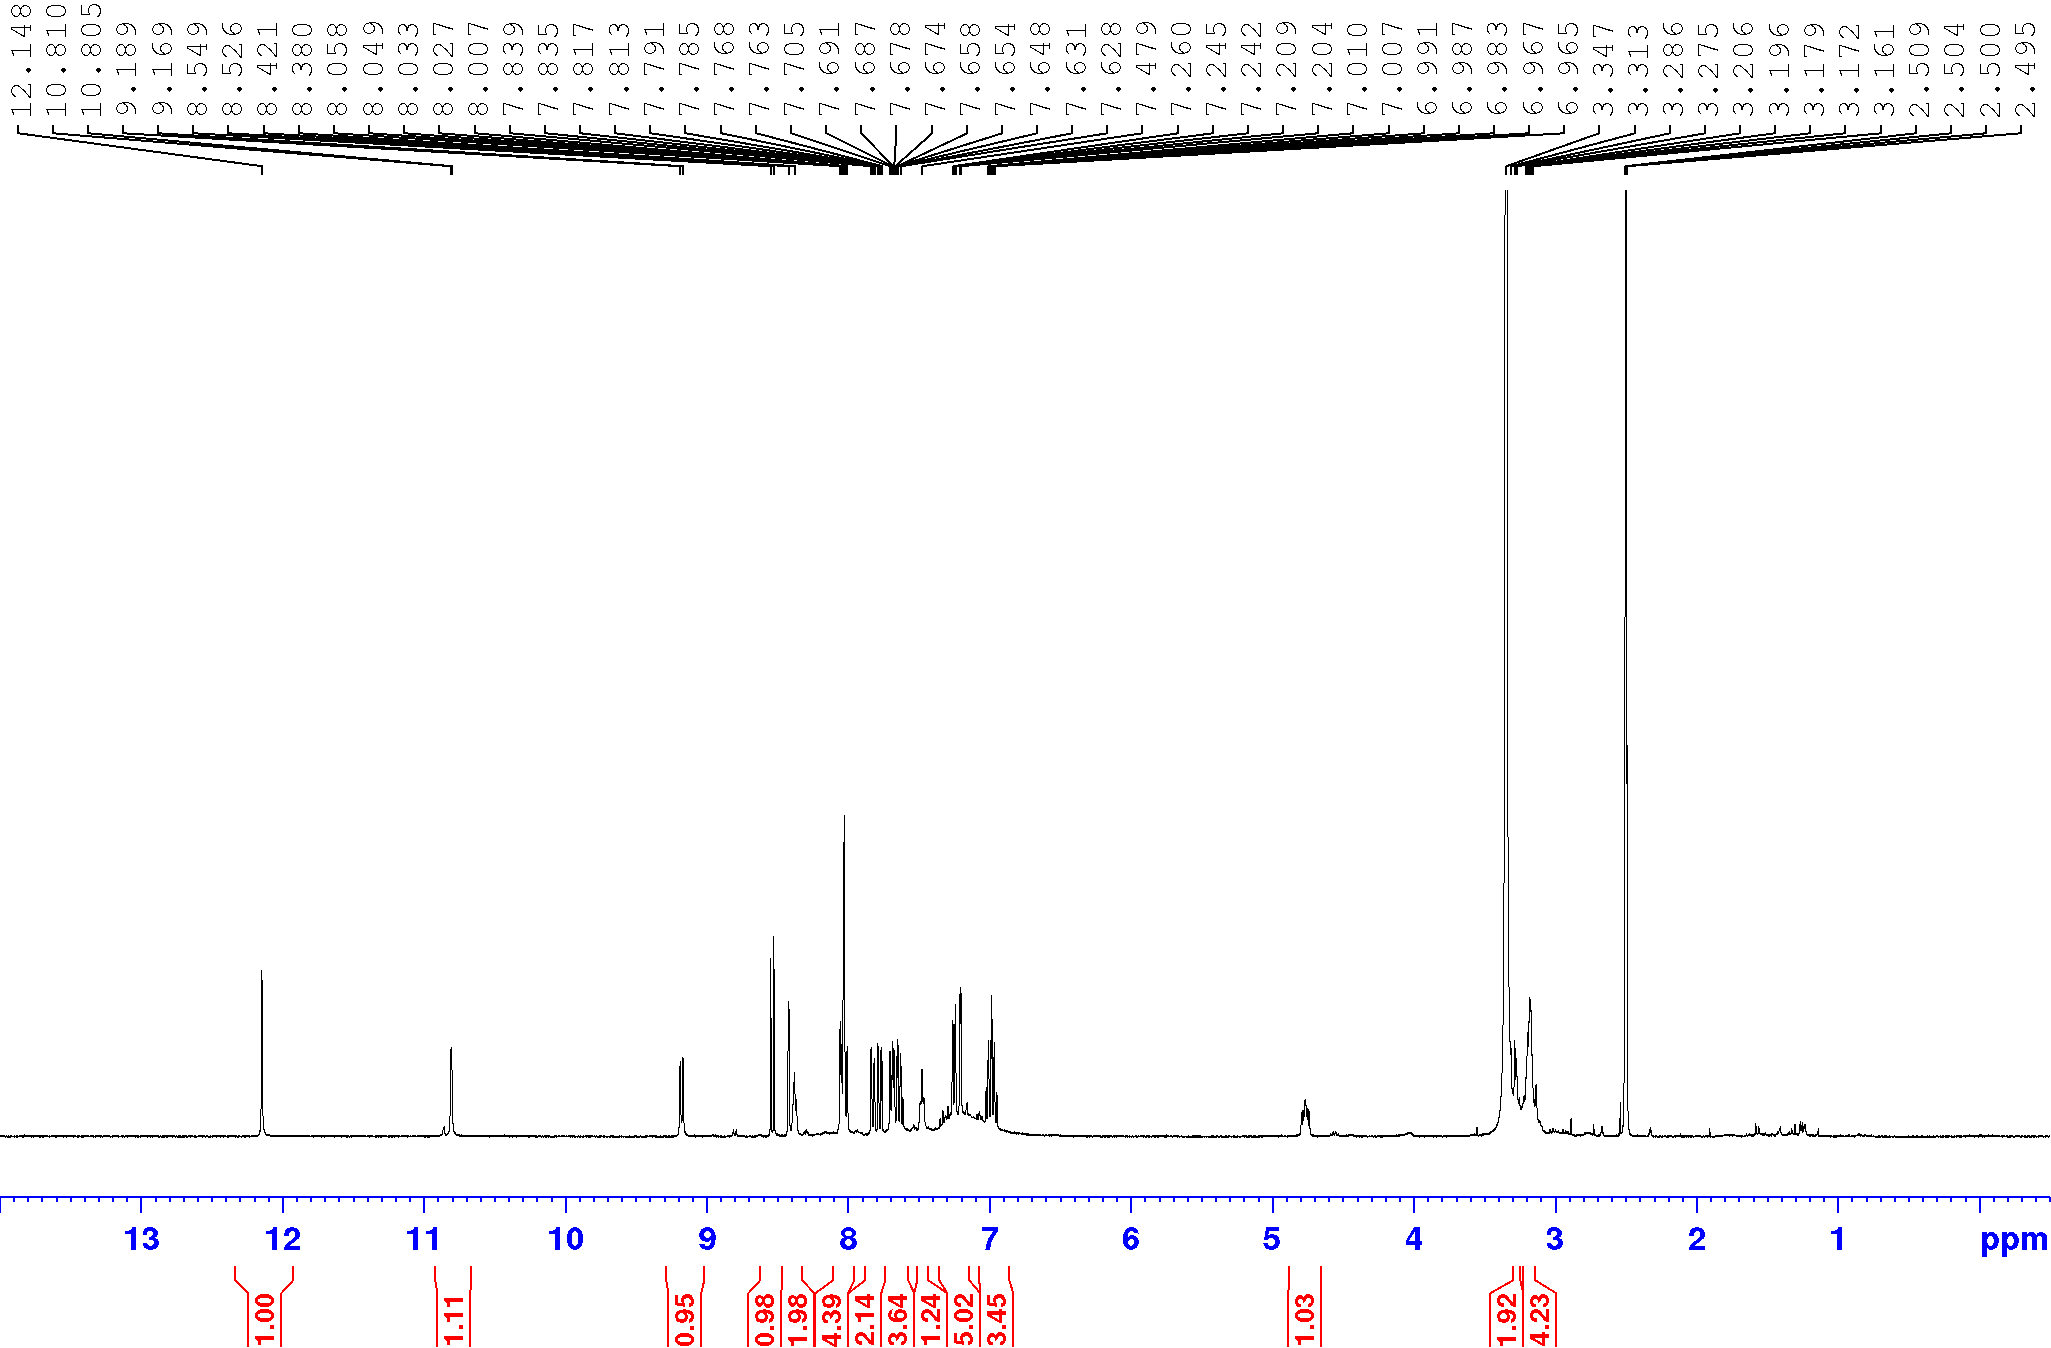


13C NMR spectra of (*S*)-*N*-(4-bromo-2-((1-((2-guanidinoethyl)amino)-3-(1*H*-indol-3-yl)-1-oxopropan-2-yl)carbamoyl)phenyl)-2-naphthamide (**9**)

1H NMR spectra of (*S*)-*N*-(2-((1-((2-guanidinoethyl)amino)-3-(*1H*-indol-3-yl)-1-oxopropan-2-yl)carbamoyl)-4-methoxyphenyl)-2-naphthamide (**10**)


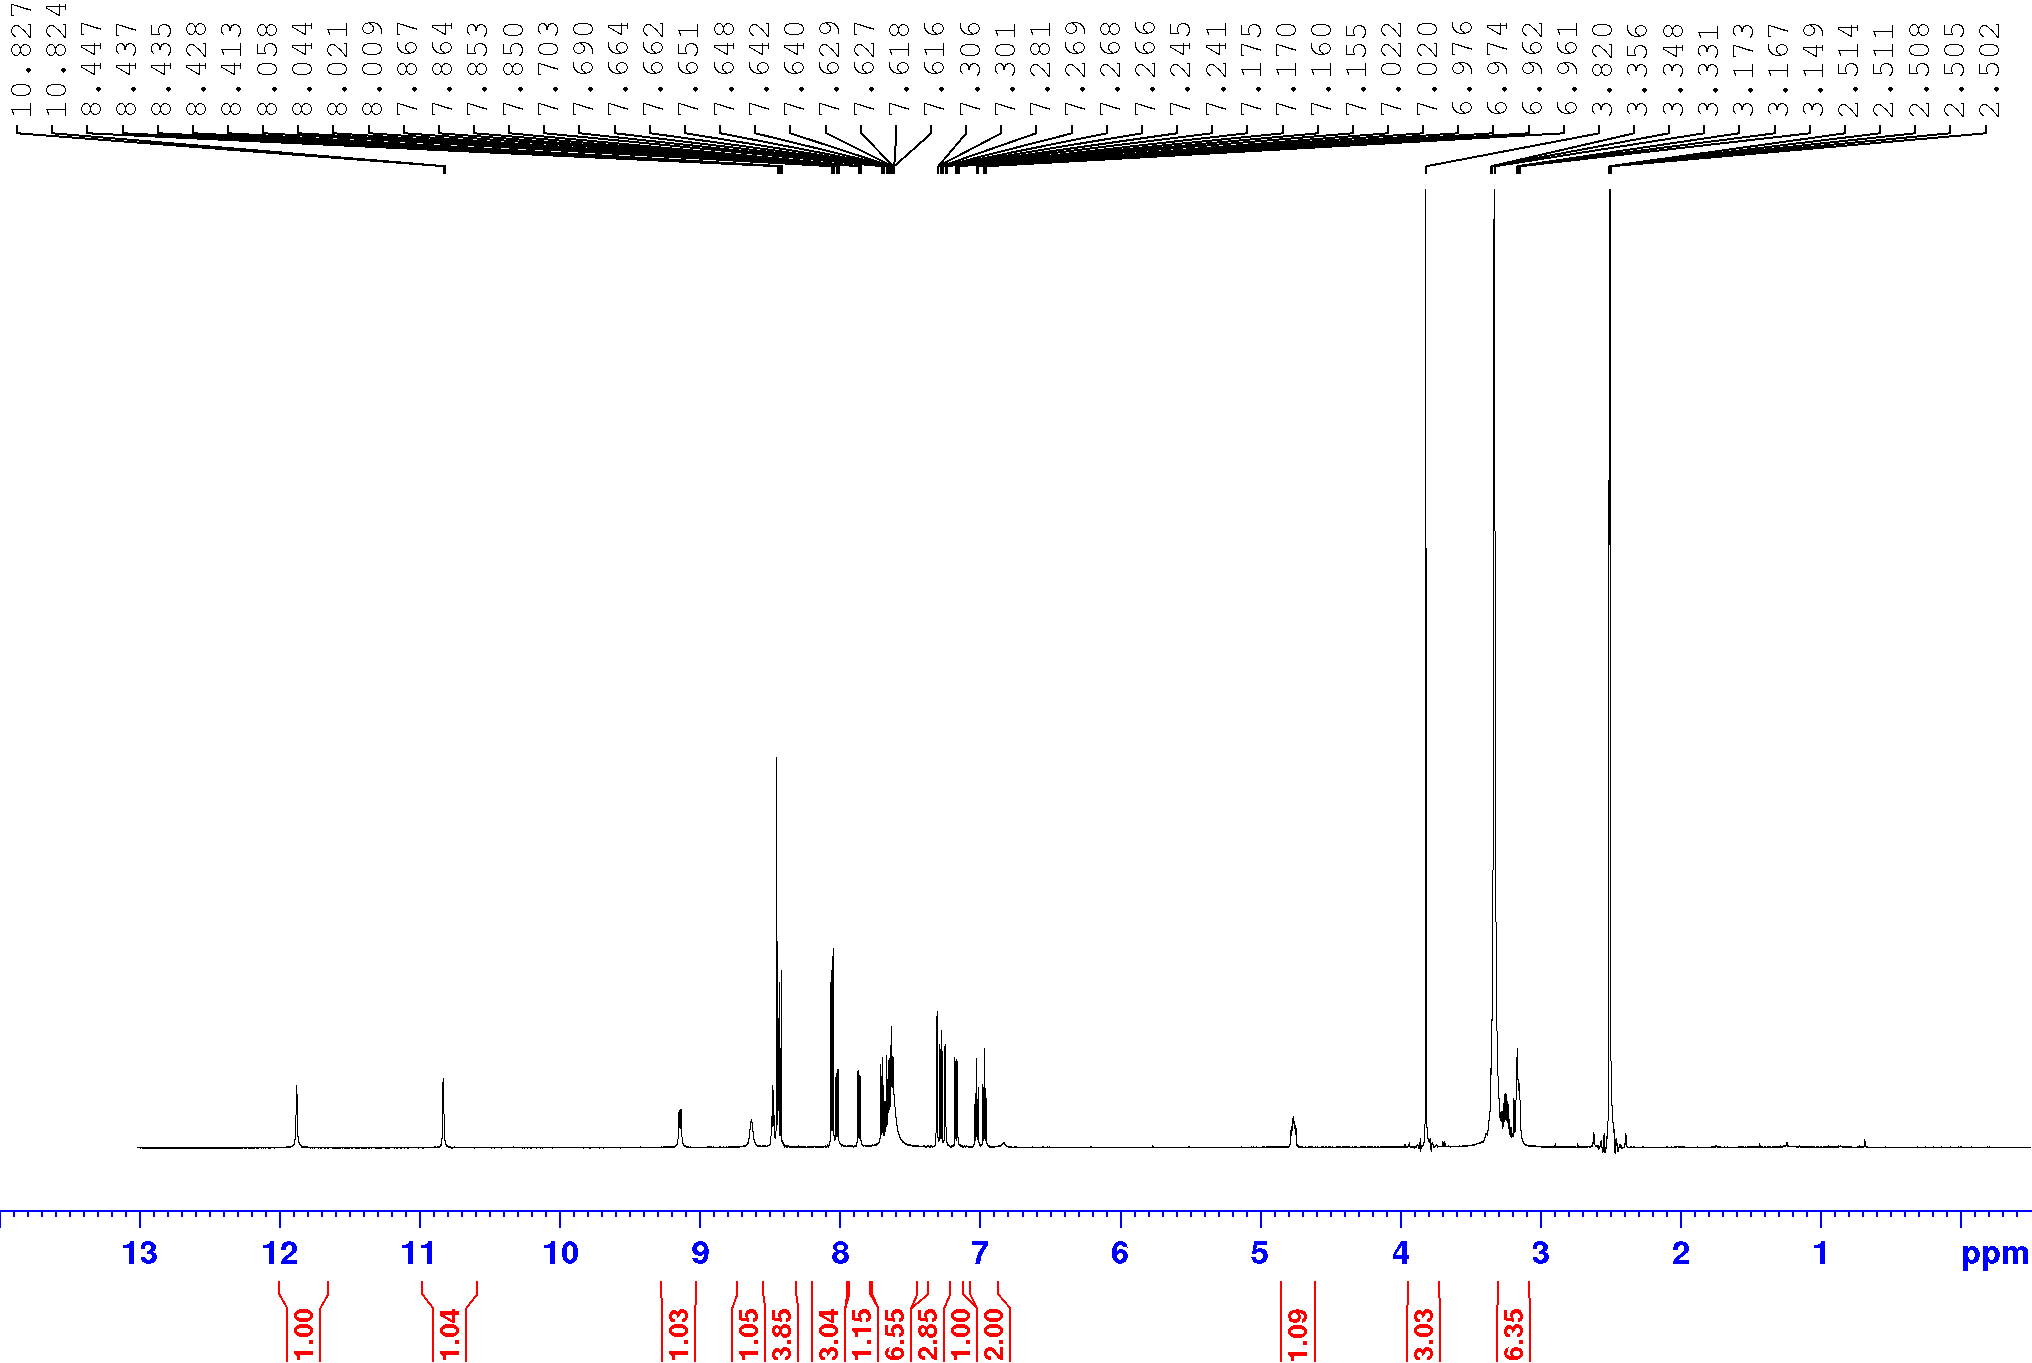


13C NMR spectra of (*S*)-*N*-(2-((1-((2-guanidinoethyl)amino)-3-(*1H*-indol-3-yl)-1-oxopropan-2-yl)carbamoyl)-4-methoxyphenyl)-2-naphthamide (**10**)

1H NMR of (*S*)-2-amino-*N*-(1-((2-aminoethyl)amino)-3-(1*H*-indol-3-yl)-1-oxopropan-2-yl)-5-(naphthalen-2-yl)benzamide (**11**)


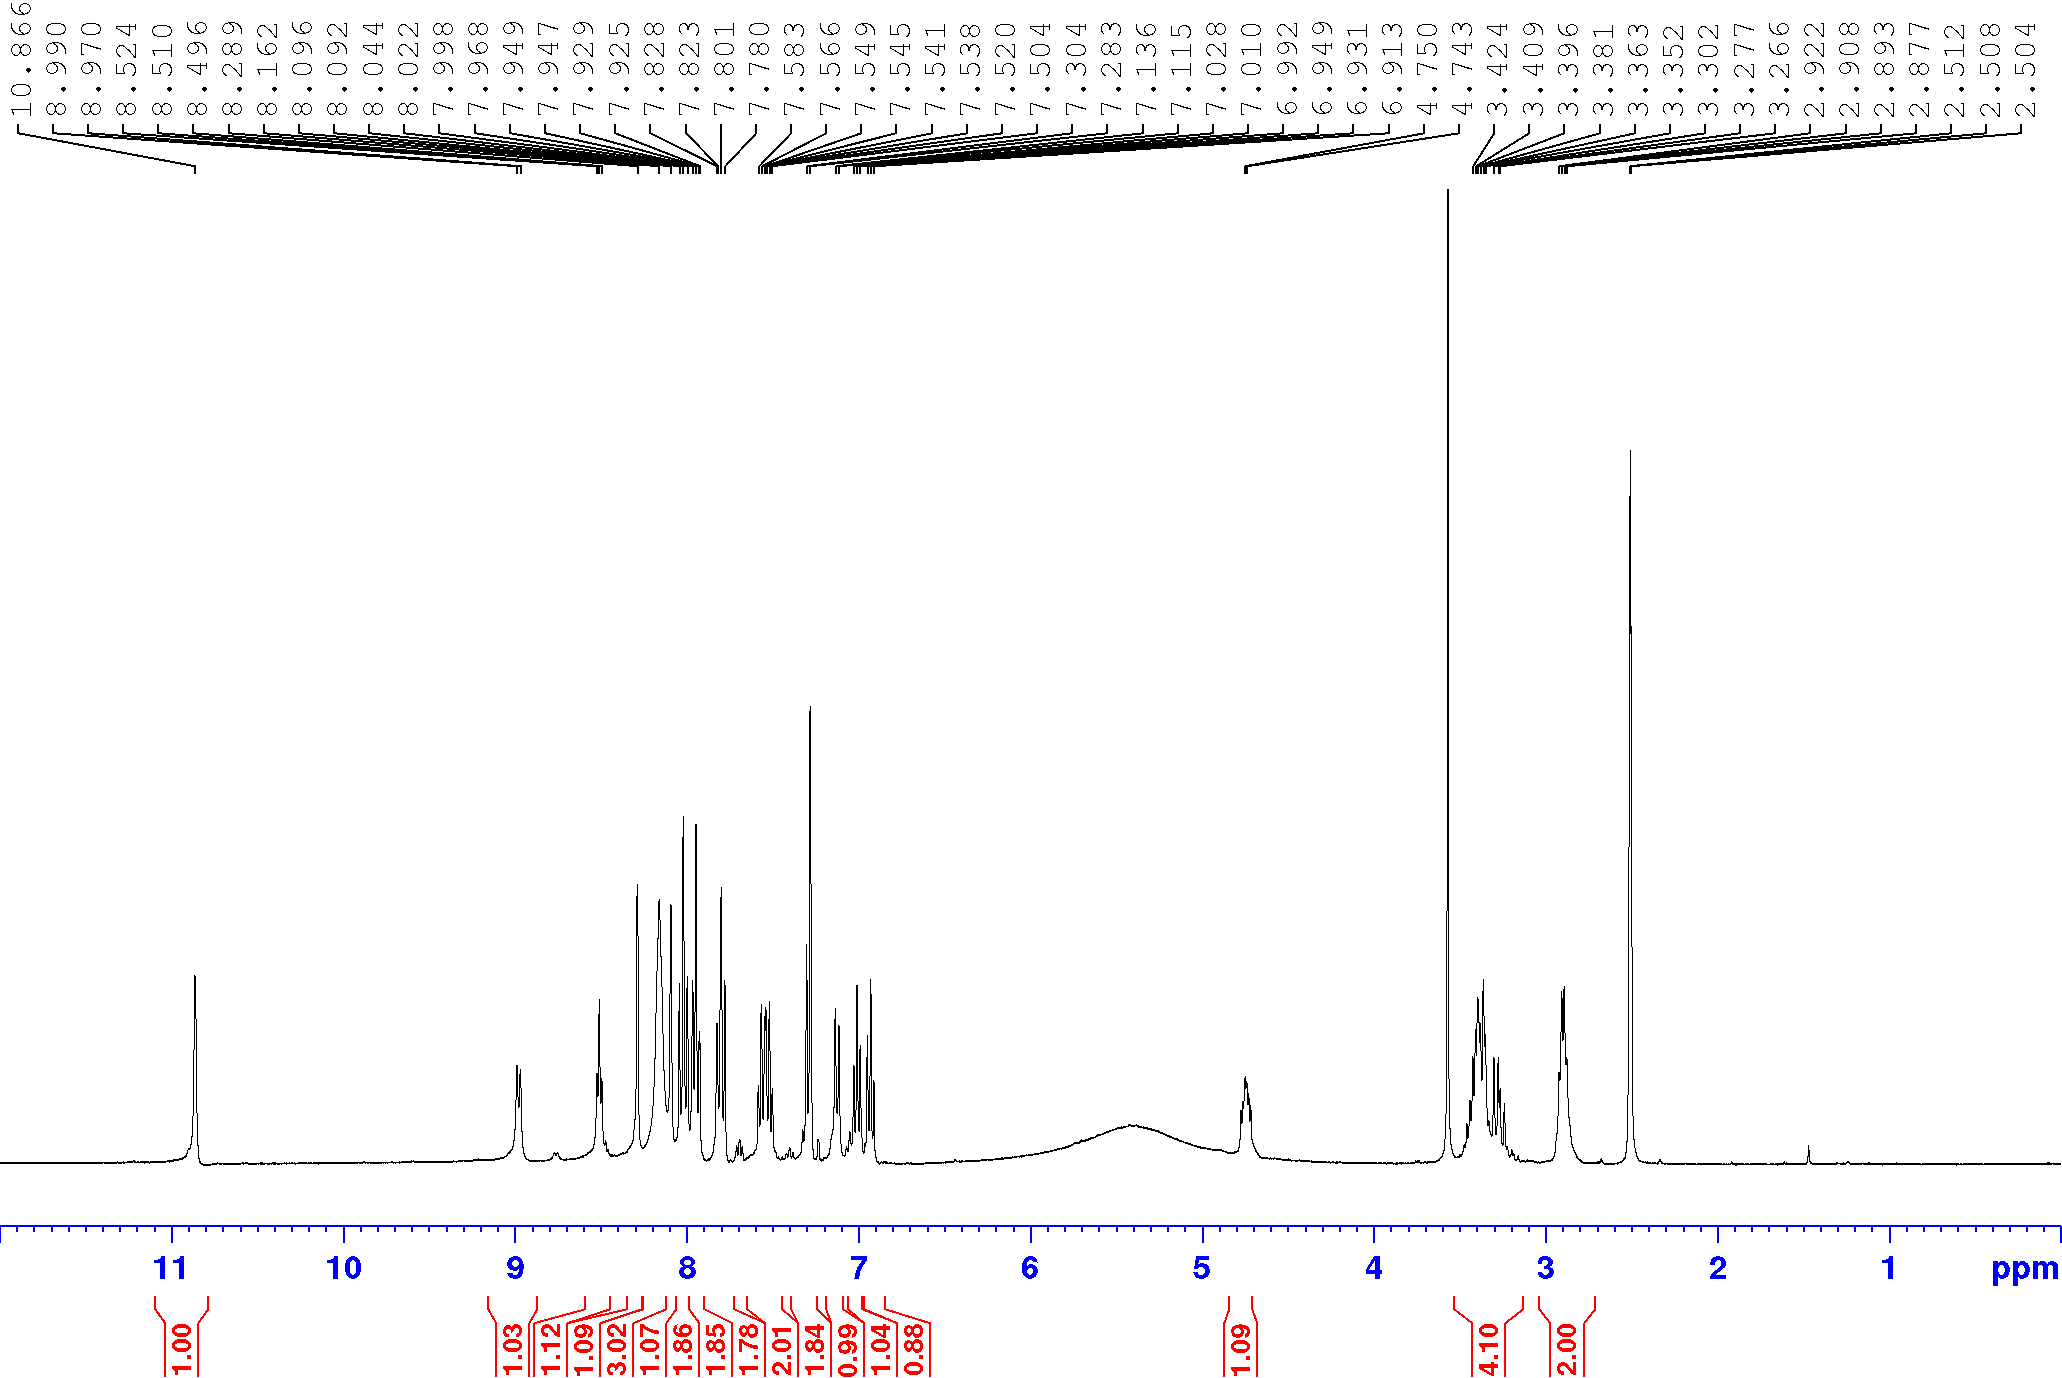


13C NMR of (*S*)-2-amino-*N*-(1-((2-aminoethyl)amino)-3-(1*H*-indol-3-yl)-1-oxopropan-2-yl)-5-(naphthalen-2-yl)benzamide (**11**)


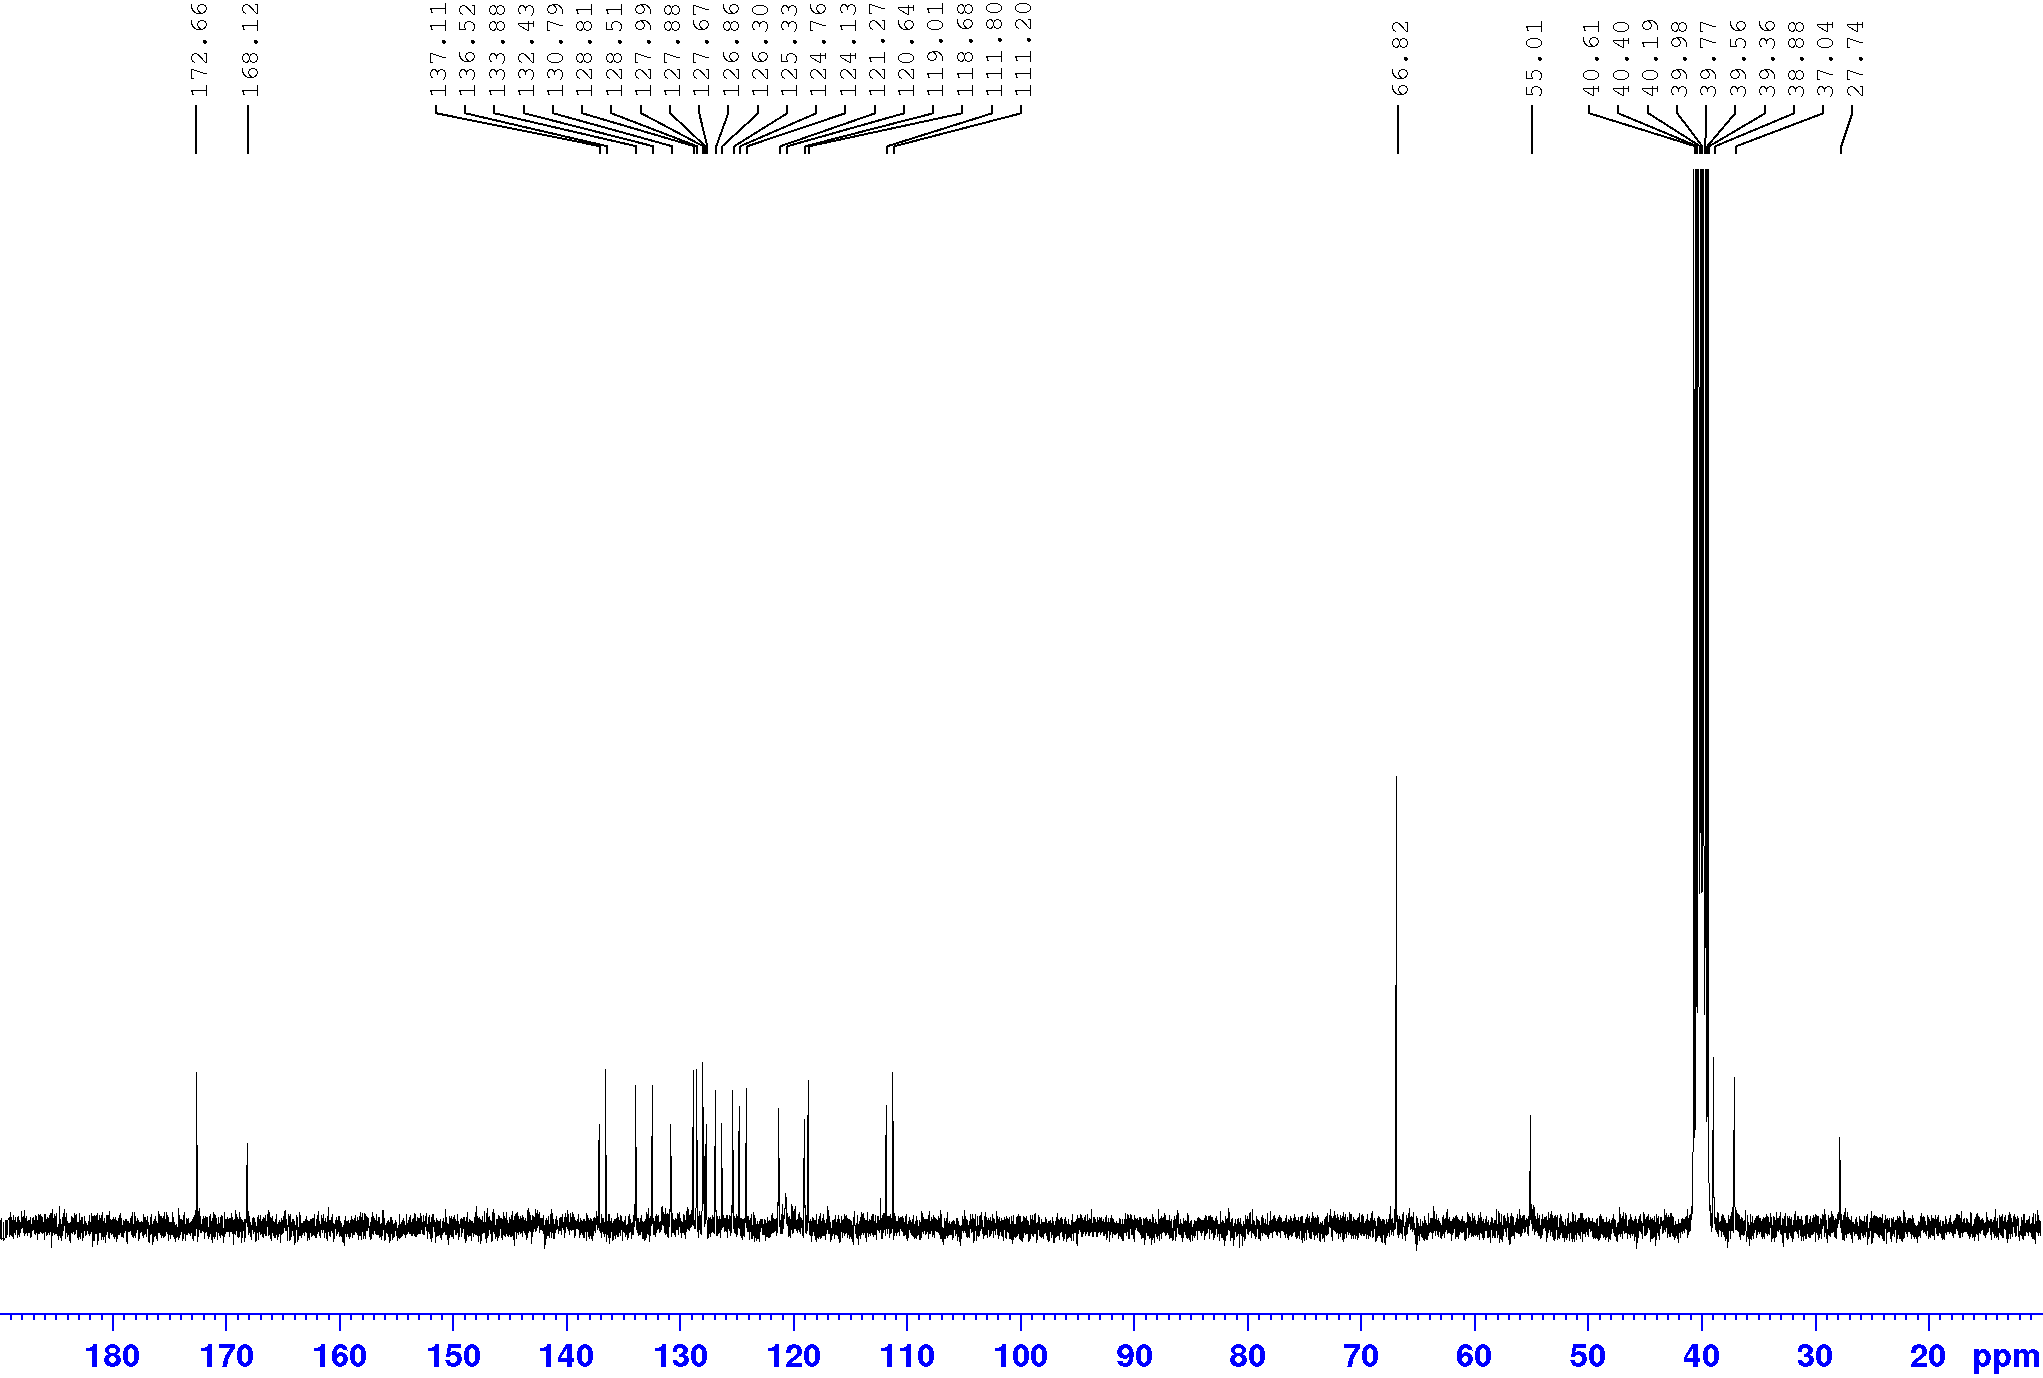


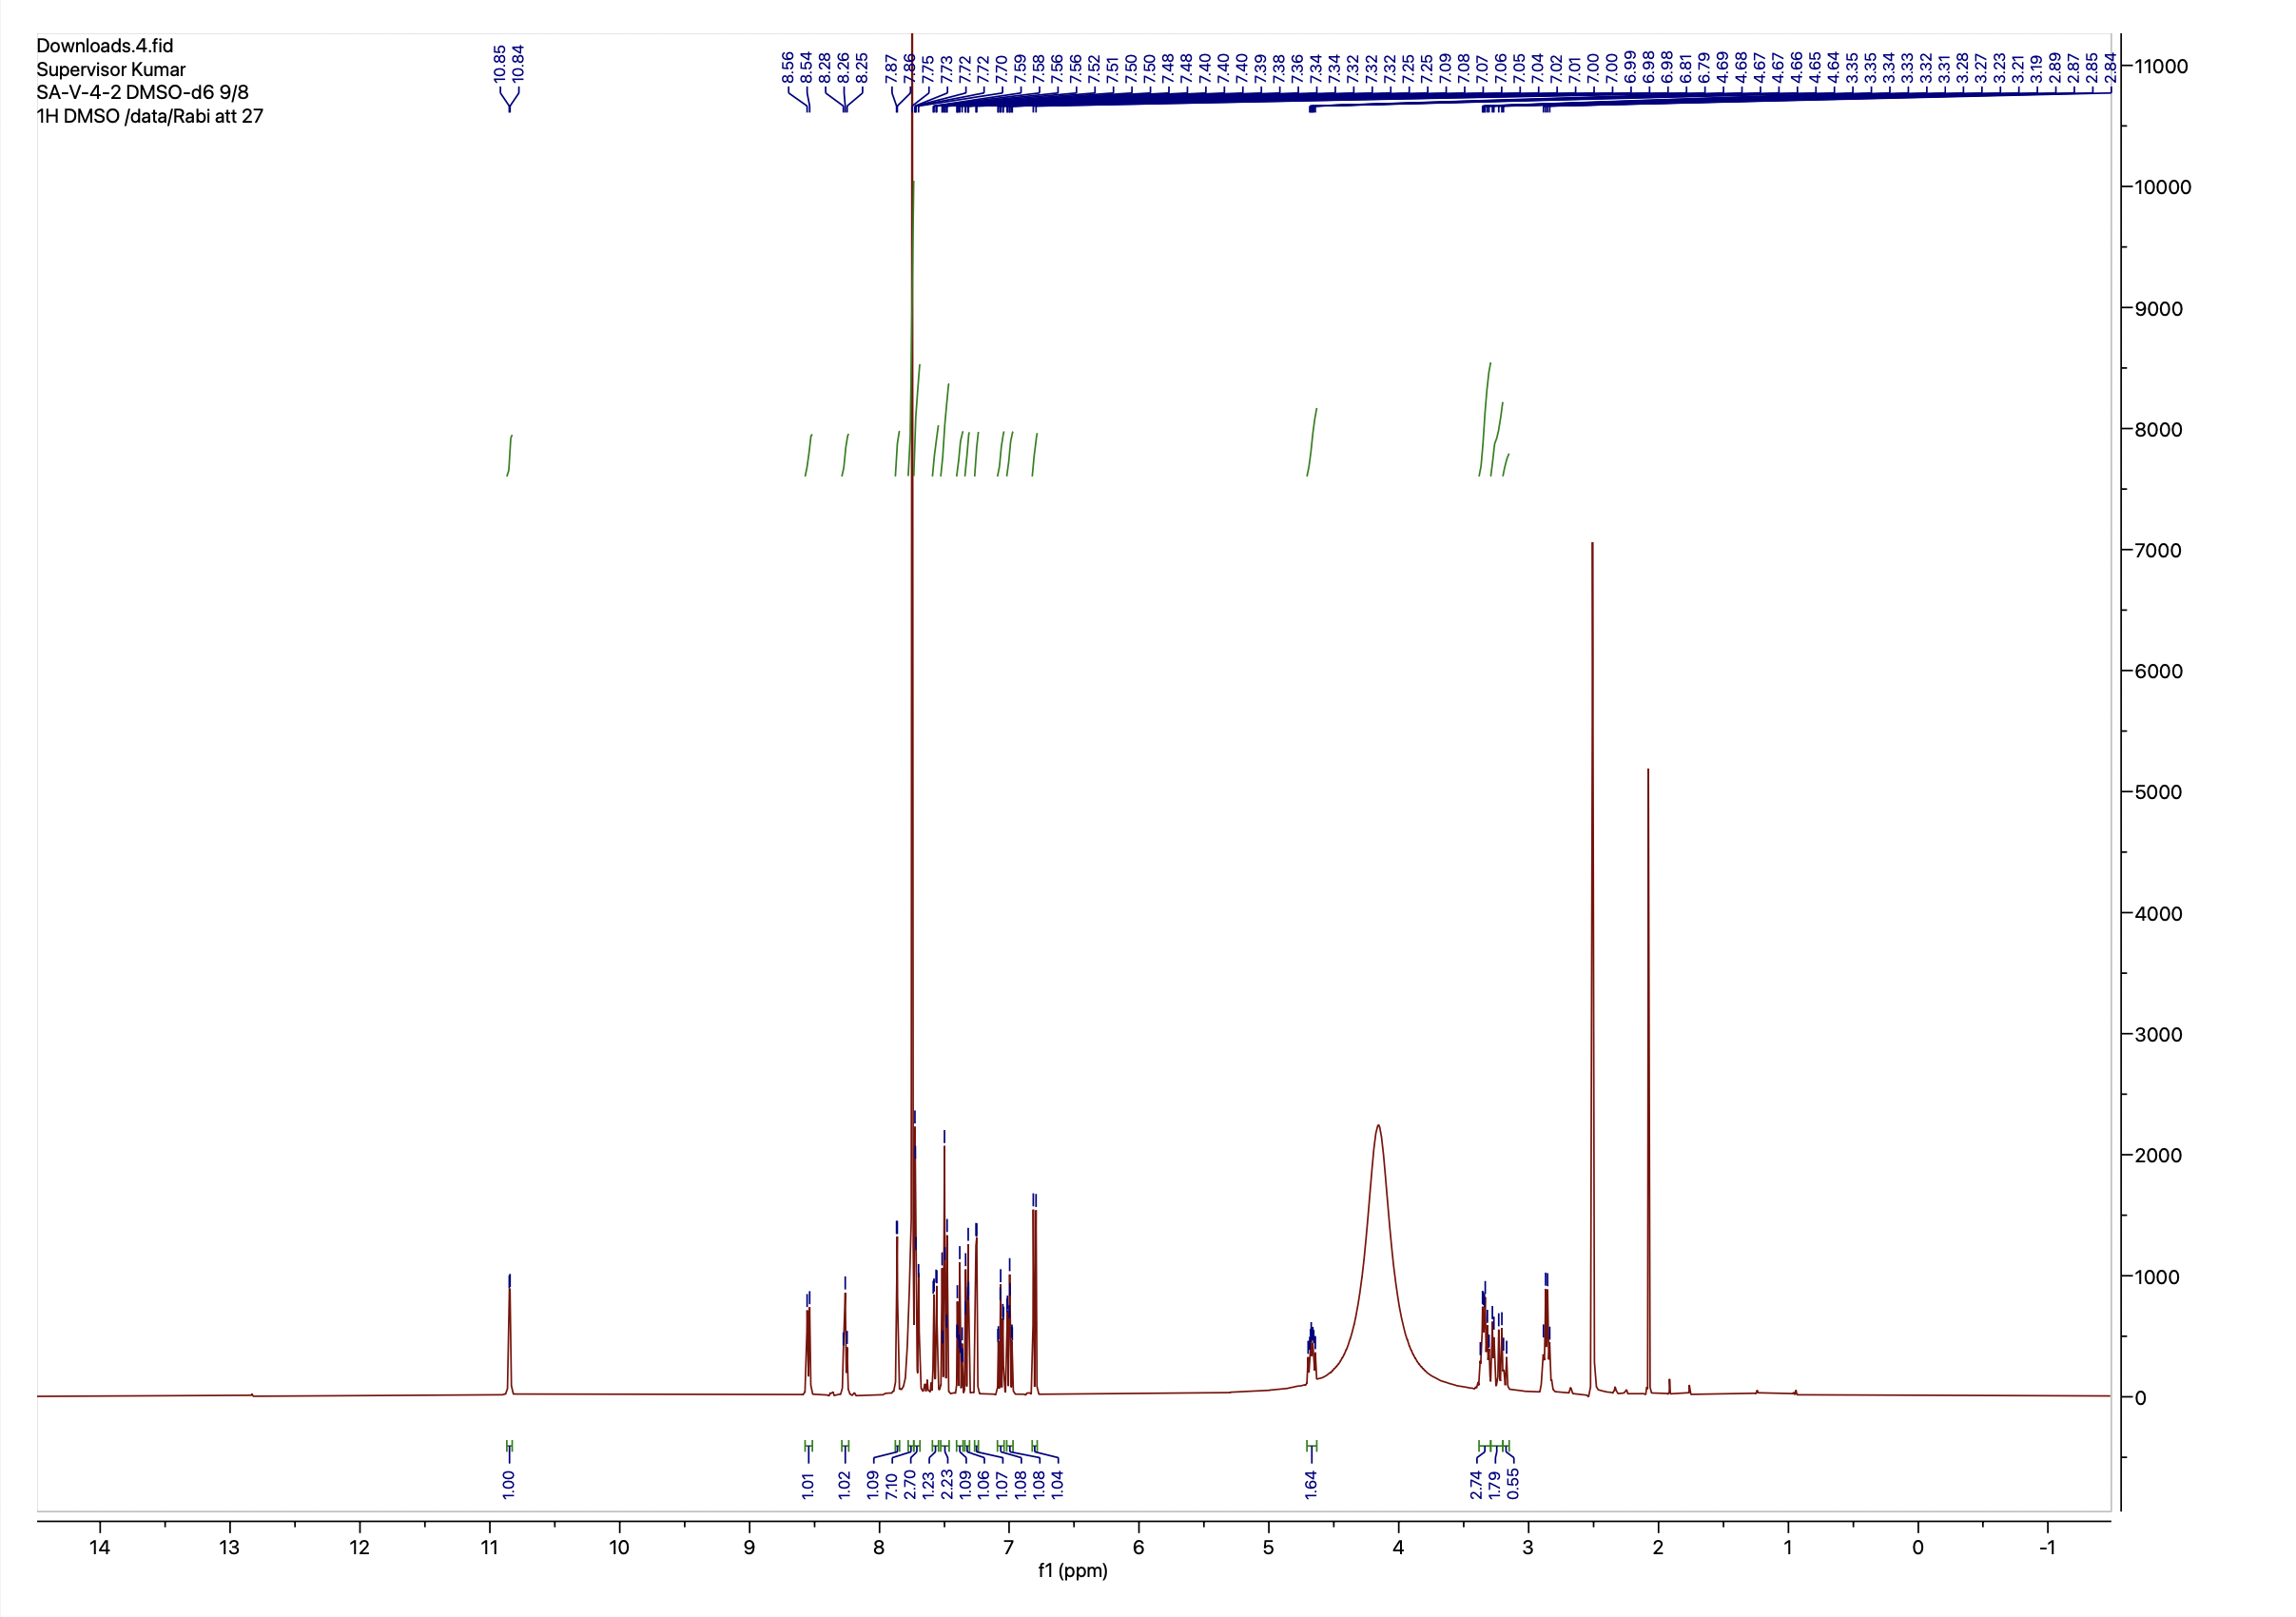
1HNMR of (*S*)-3-((1-((2-ammonioethyl)amino)-3-(1*H*-indol-3-yl)-1-oxopropan-2-yl)carbamoyl)-[1,1':4',1''-terphenyl]-4-aminium (**12**)

13C NMR of (*S*)-3-((1-((2-ammonioethyl)amino)-3-(1*H*-indol-3-yl)-1-oxopropan-2-yl)carbamoyl)-[1,1':4',1''-terphenyl]-4-aminium (**12**)


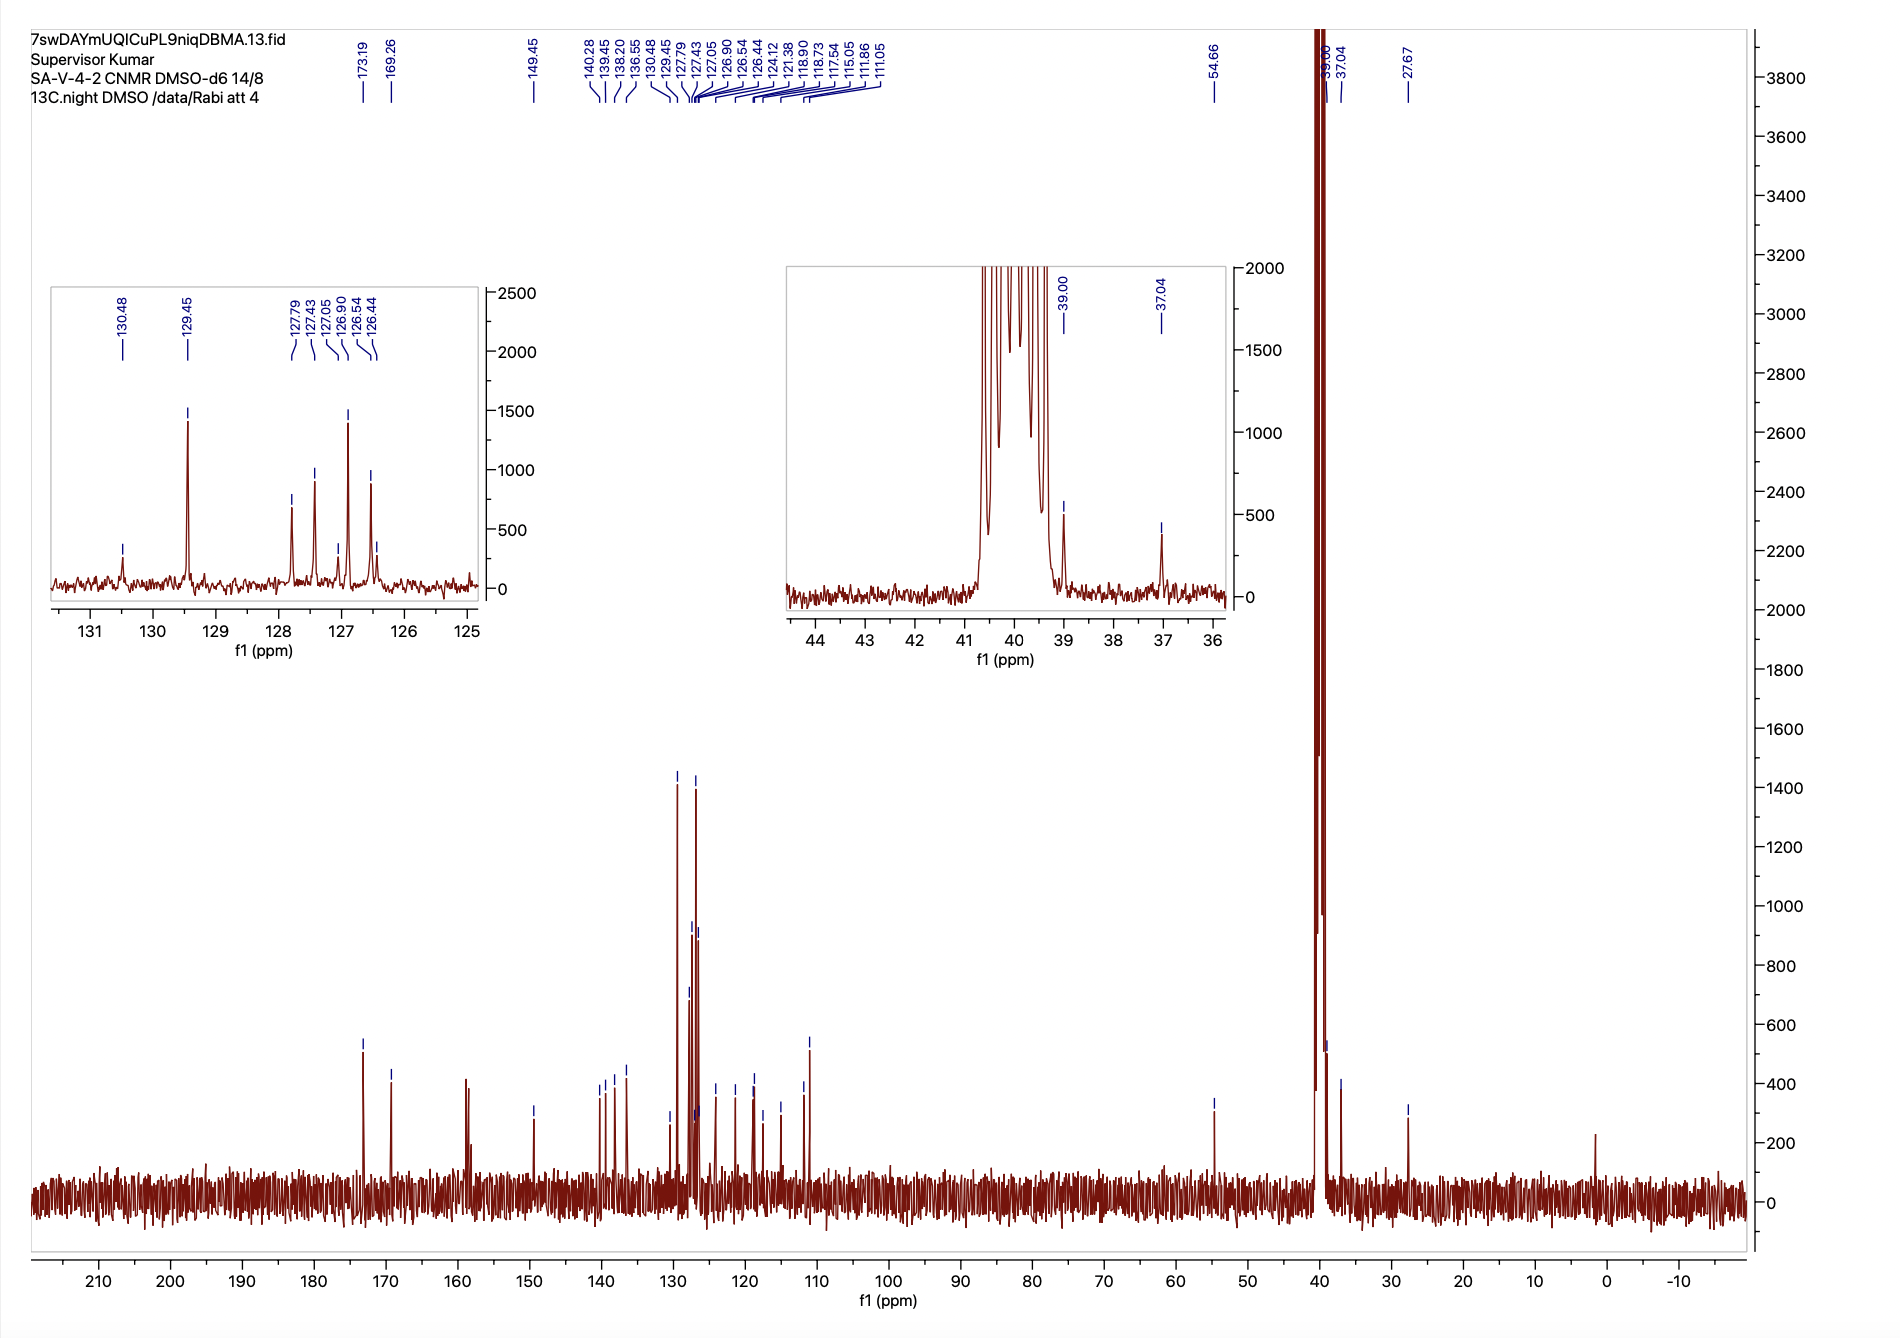


1H NMR of (*S*)-2-((1-((2-ammonioethyl)amino)-3-(1*H*-indol-3-yl)-1-oxopropan-2-yl)carbamoyl)-4-(2,4-dimethoxypyrimidin-5-yl)benzenaminium
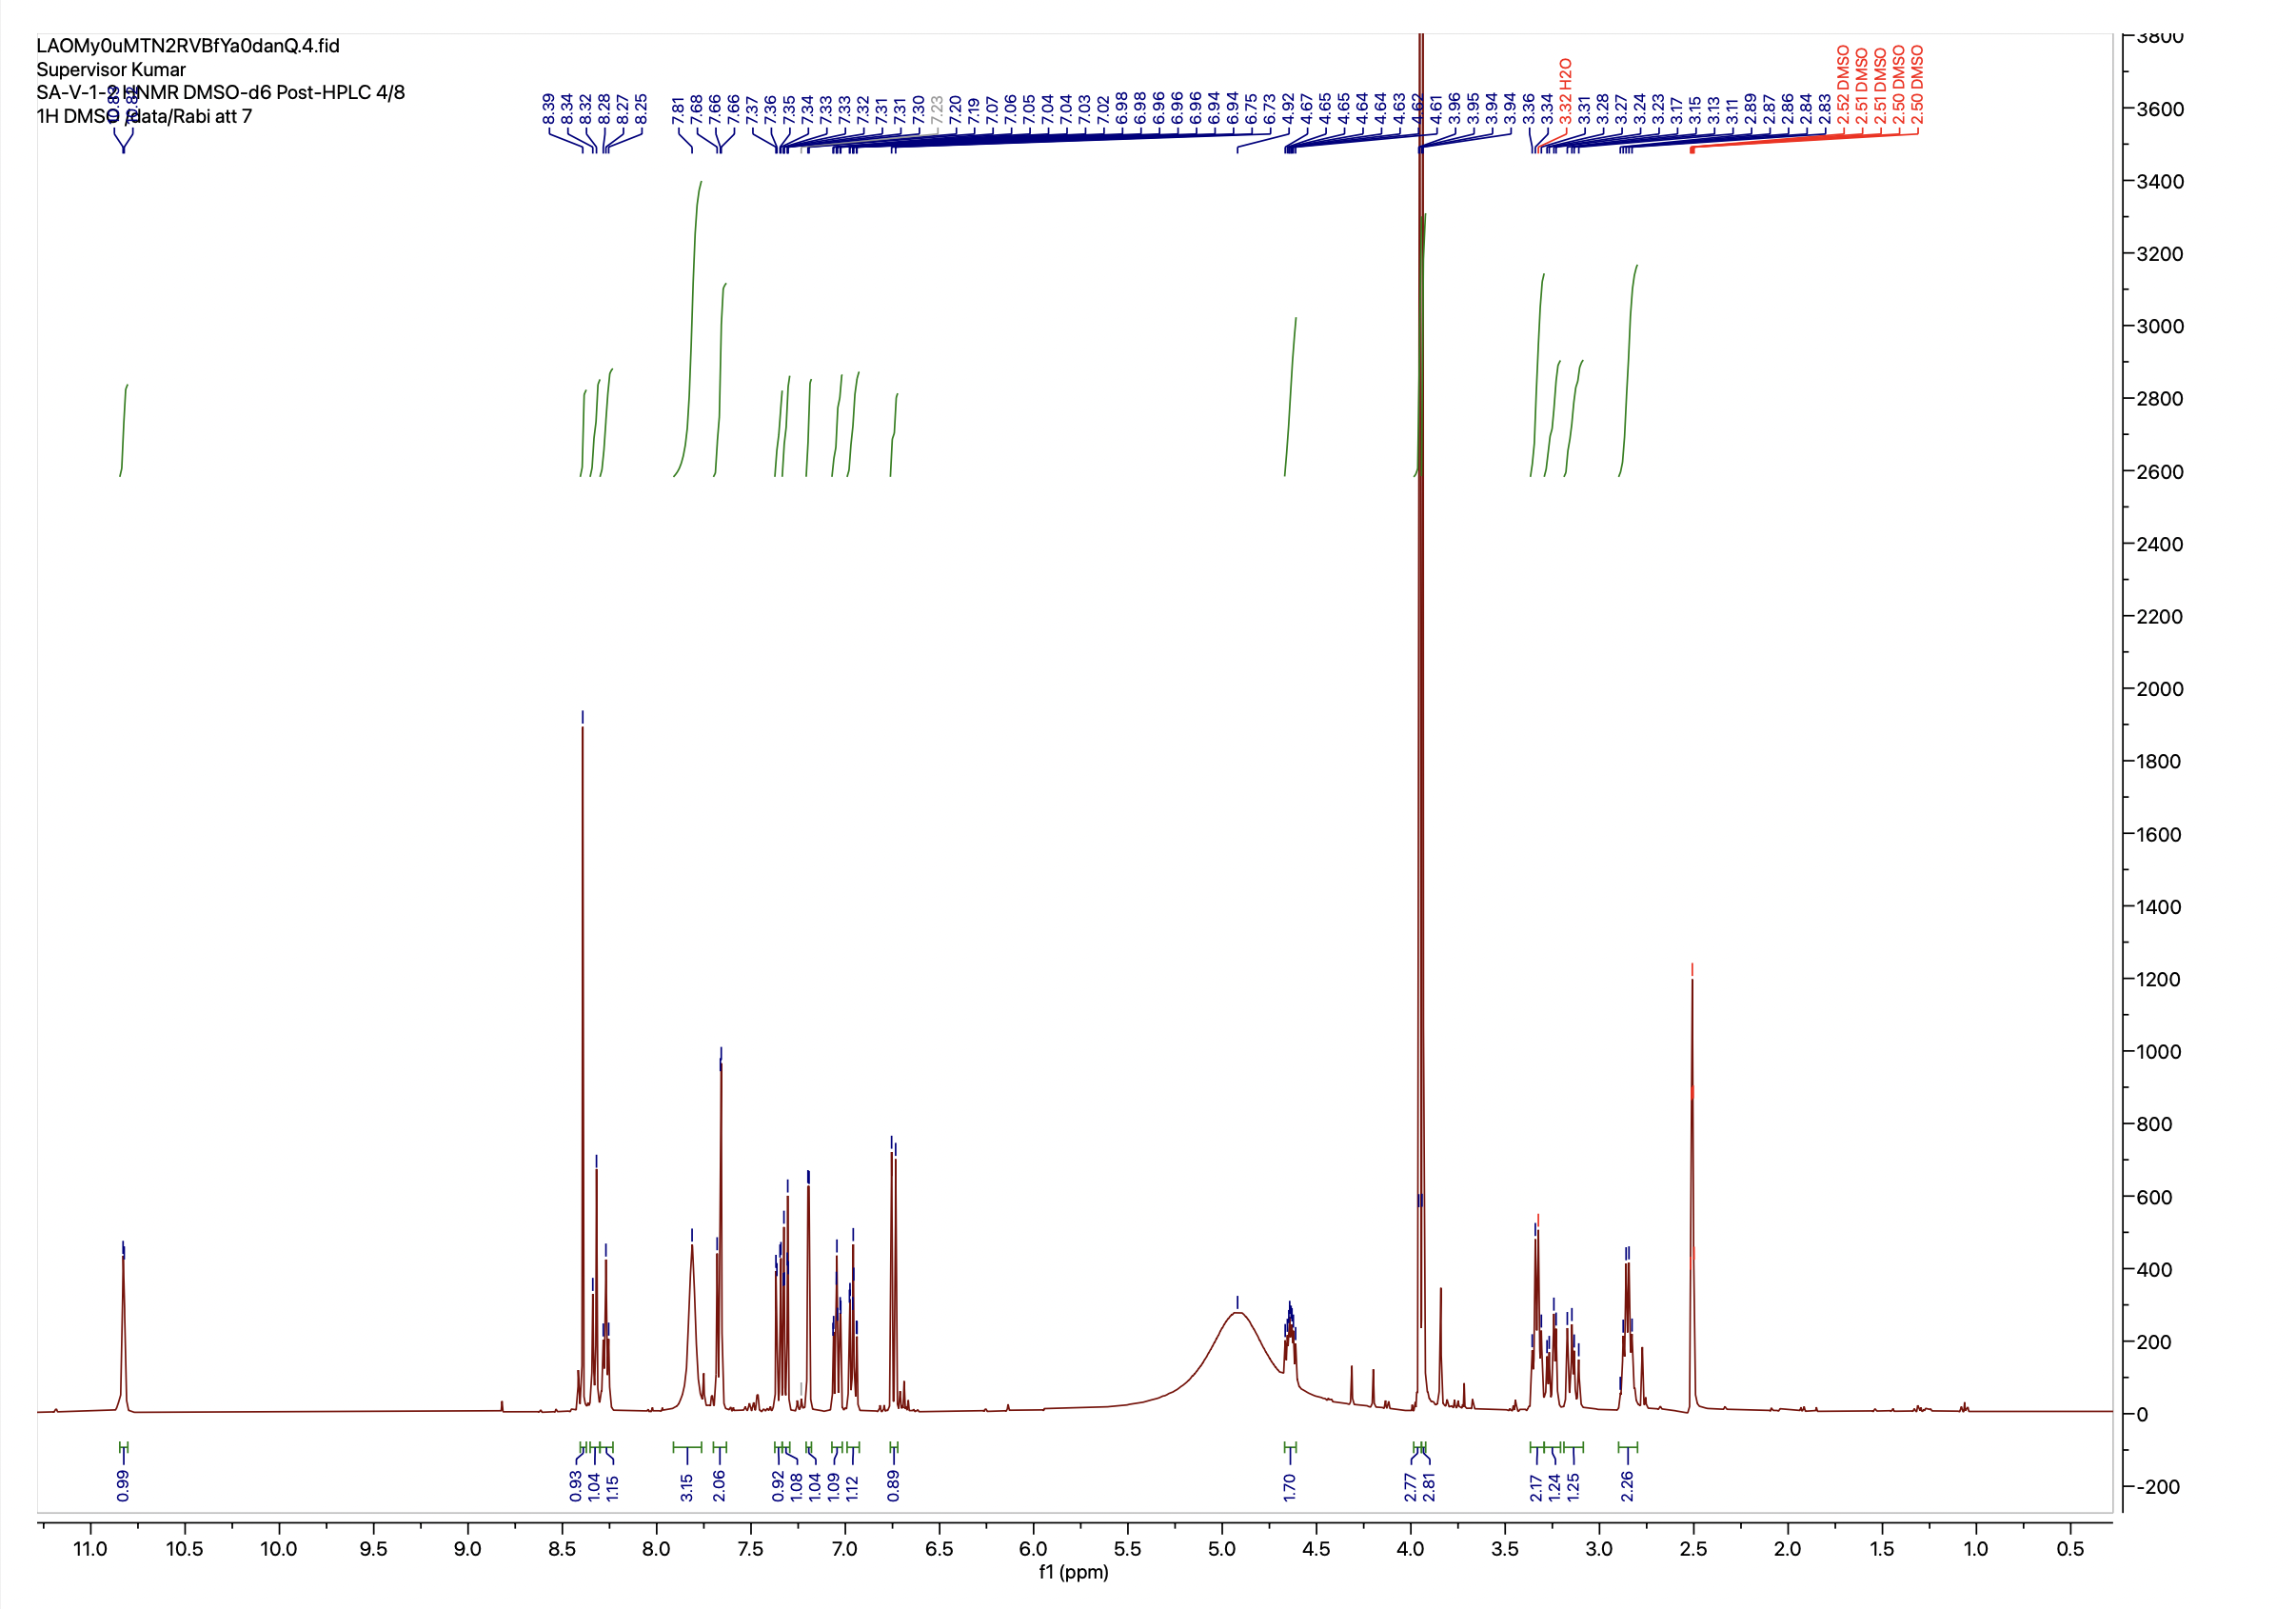
 (**13**)

13C NMR of (*S*)-2-((1-((2-ammonioethyl)amino)-3-(1*H*-indol-3-yl)-1-oxopropan-2-yl)carbamoyl)-4-(2,4-dimethoxypyrimidin-5-yl)benzenaminium (**13**)
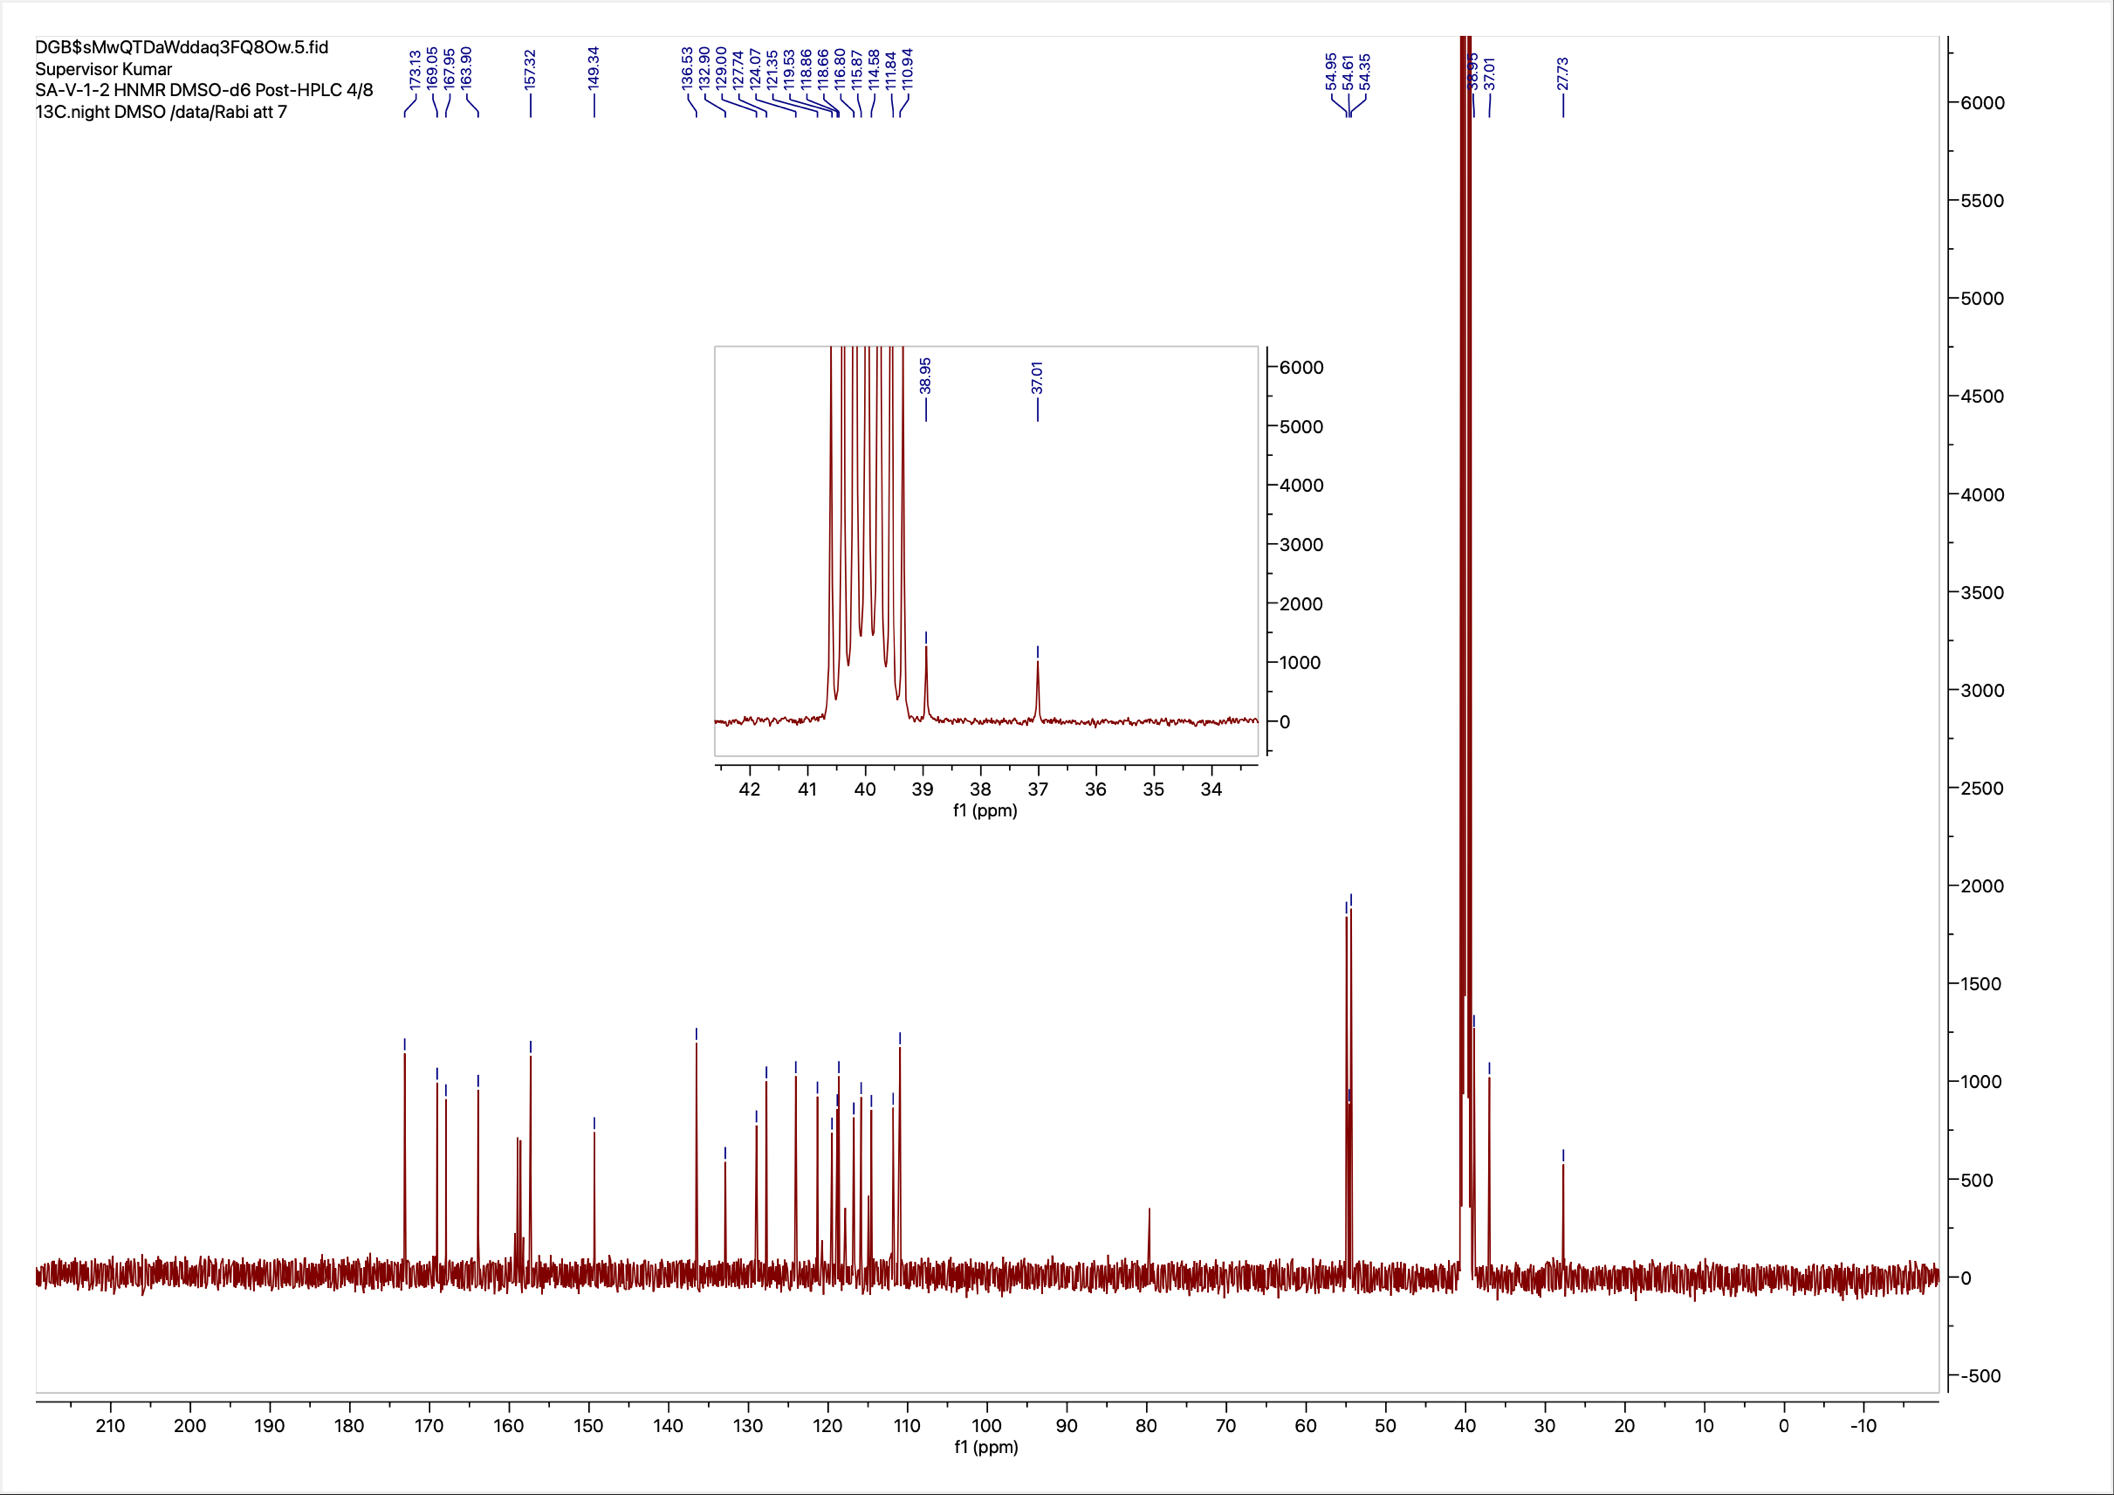


1H NMR of (*S*)-3-((1-((2-ammonioethyl)amino)-3-(1*H*-indol-3-yl)-1-oxopropan-2-yl)carbamoyl)-[1,1':2',1''-terphenyl]-4-aminium
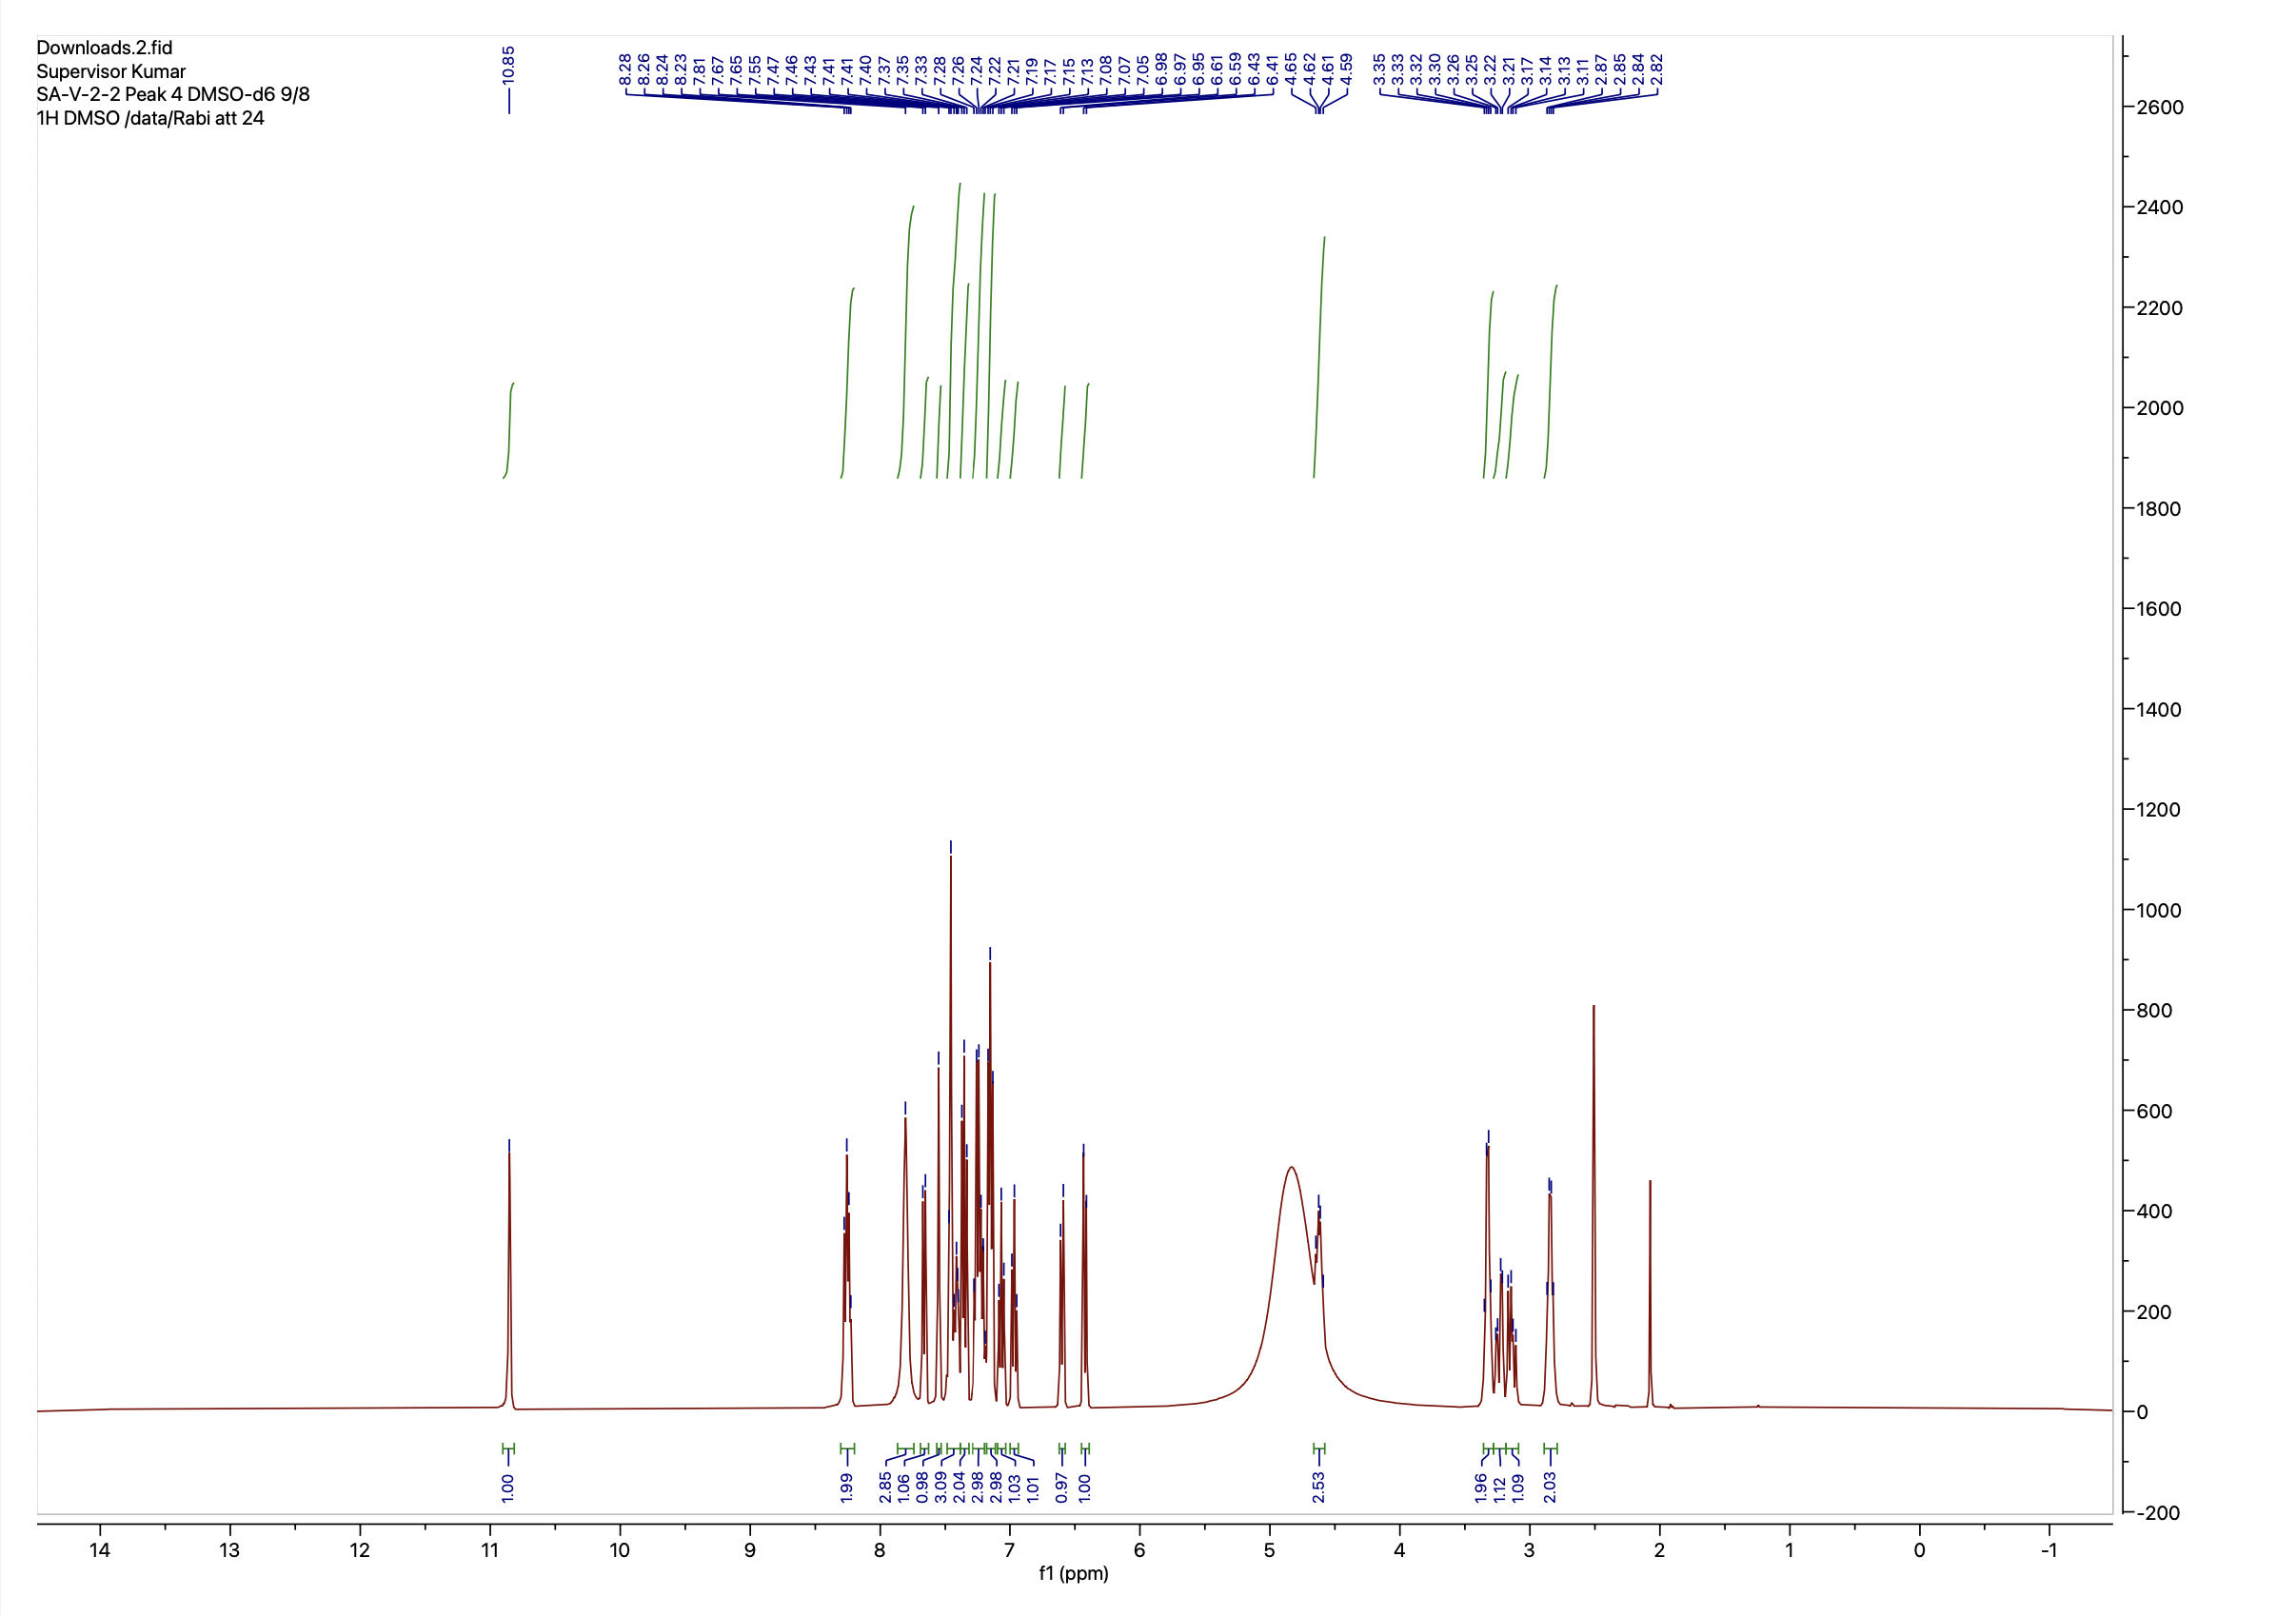
 (**14**)


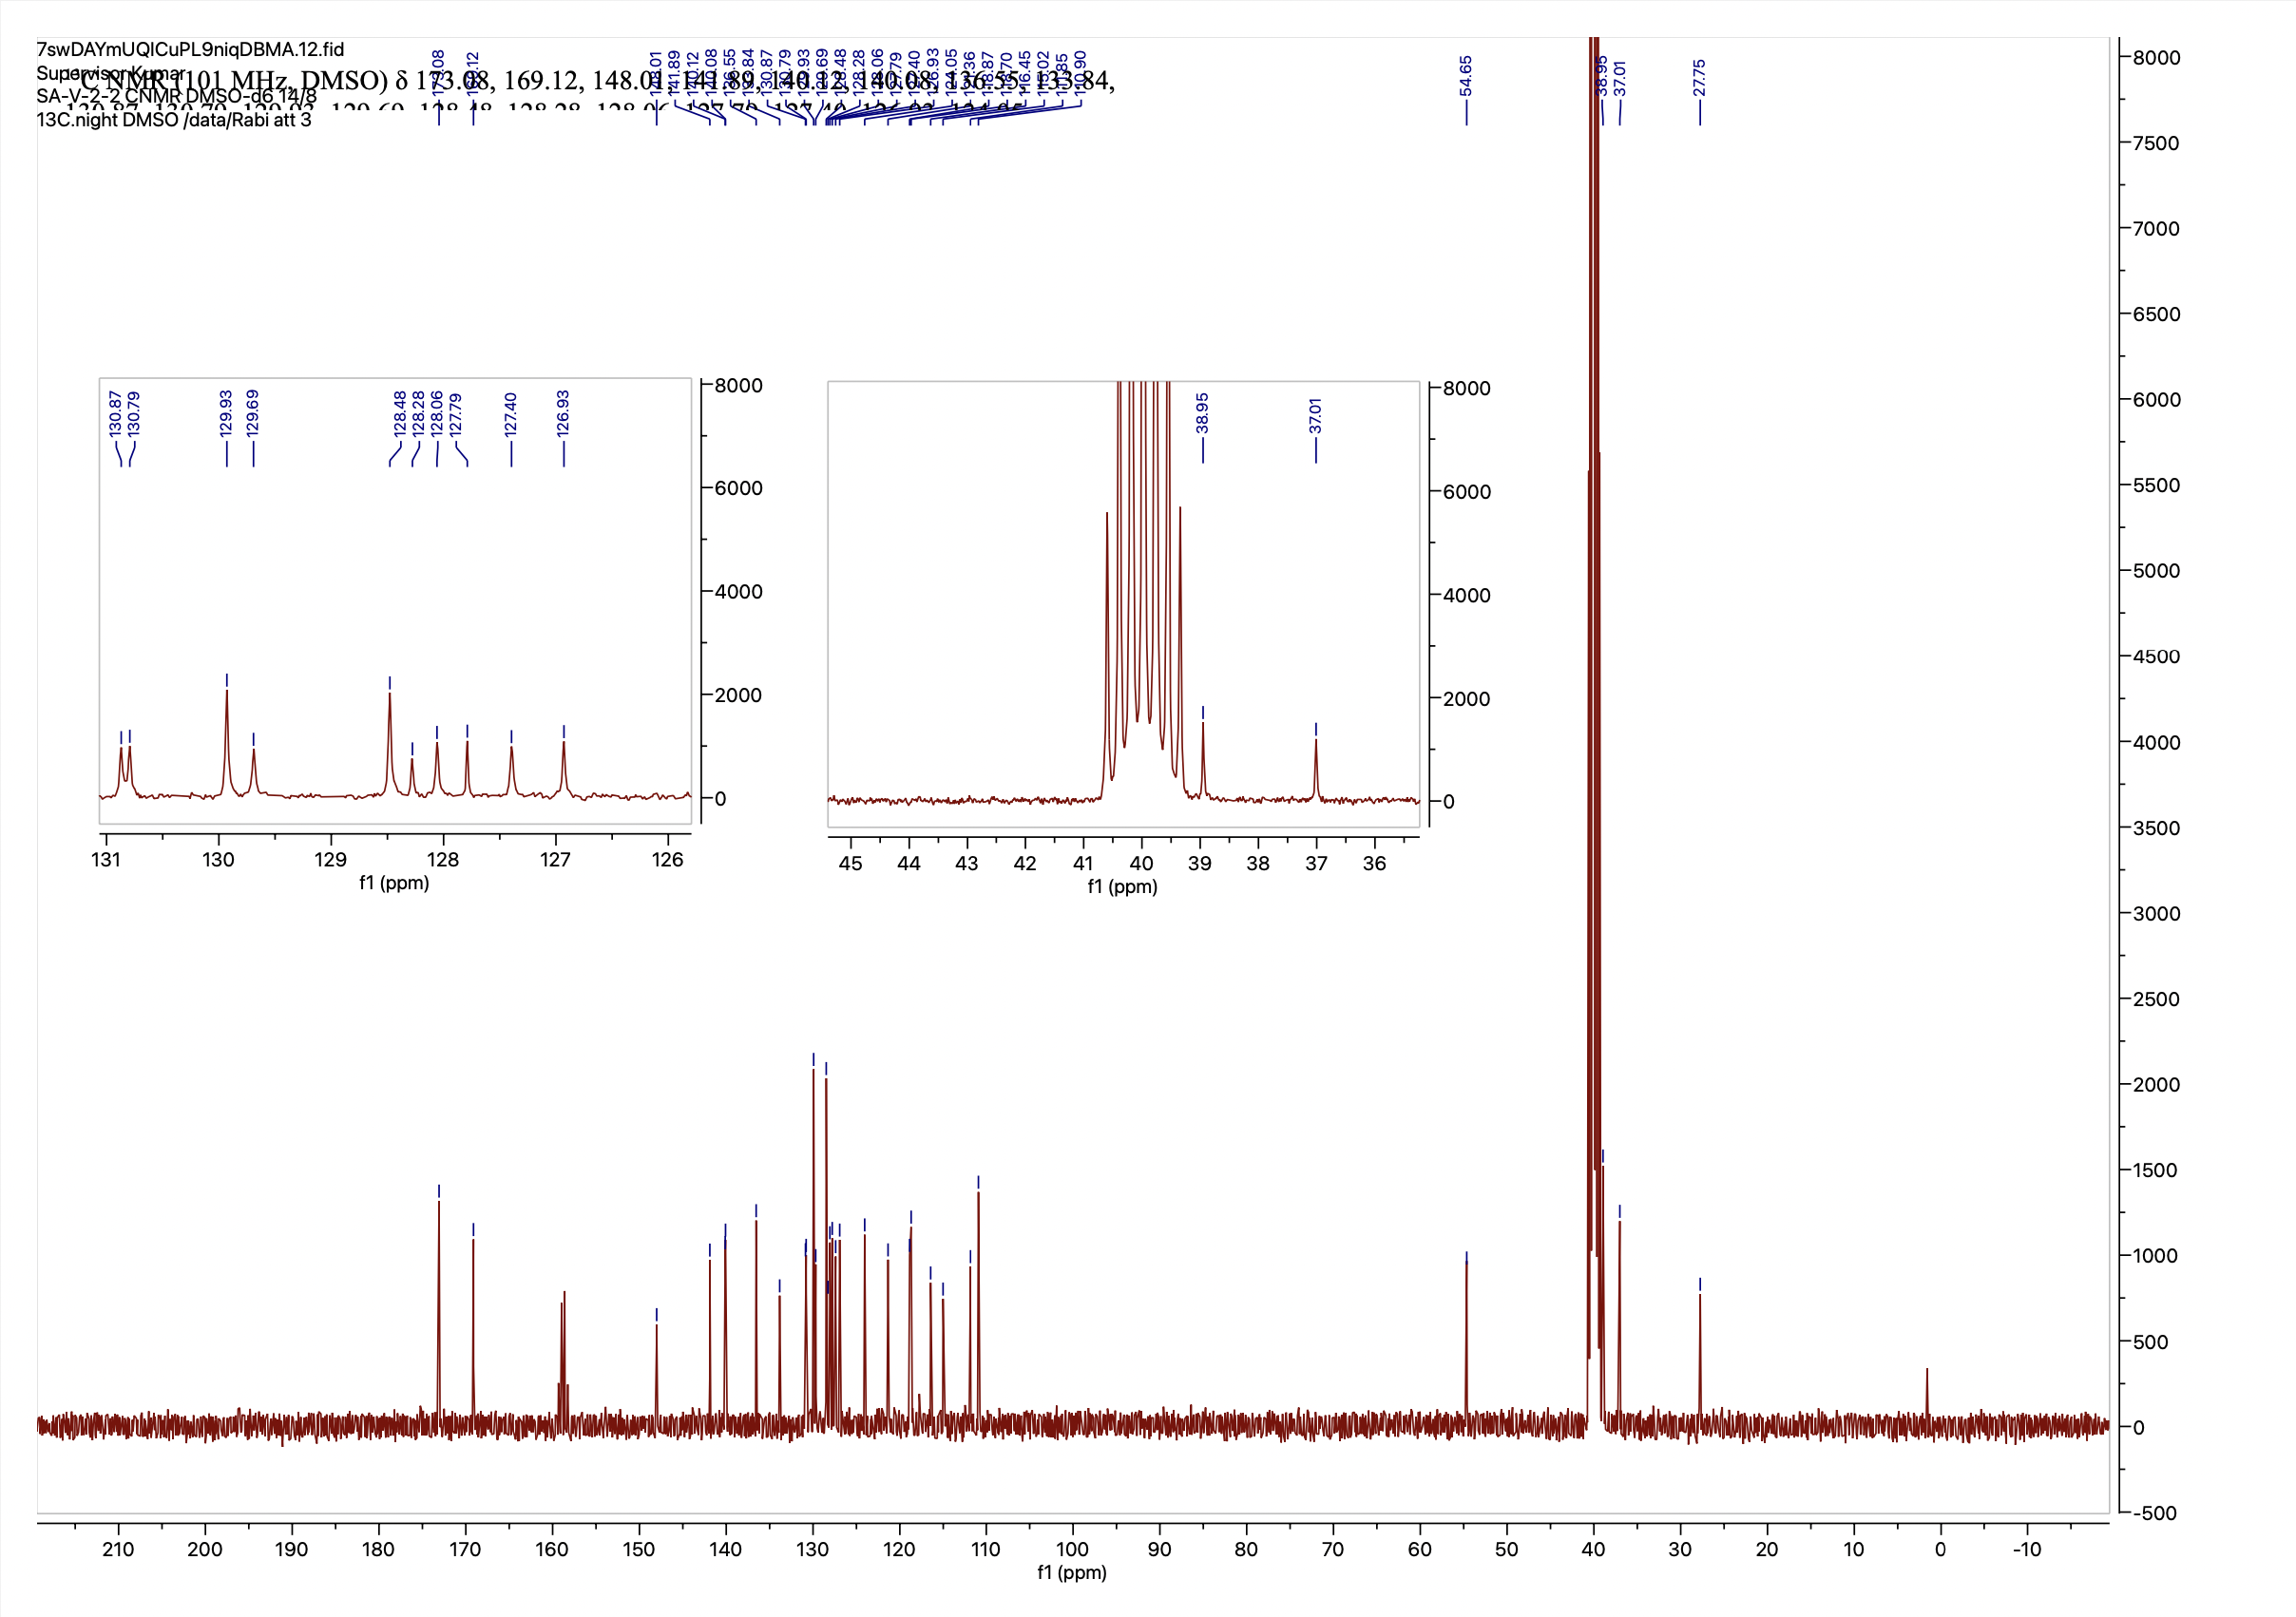
13C NMR of (*S*)-3-((1-((2-ammonioethyl)amino)-3-(1*H*-indol-3-yl)-1-oxopropan-2-yl)carbamoyl)-[1,1':2',1''-terphenyl]-4-aminium (**14**)

1H NMR of *N*-(4-bromo-2-(((*S*)-1-((2-((*S*)-2,6-diaminohexanamido)ethyl)amino)-3-(1*H*-indol-3-yl)-1-oxopropan-2-yl)carbamoyl)phenyl)-2-naphthamide (**15**)


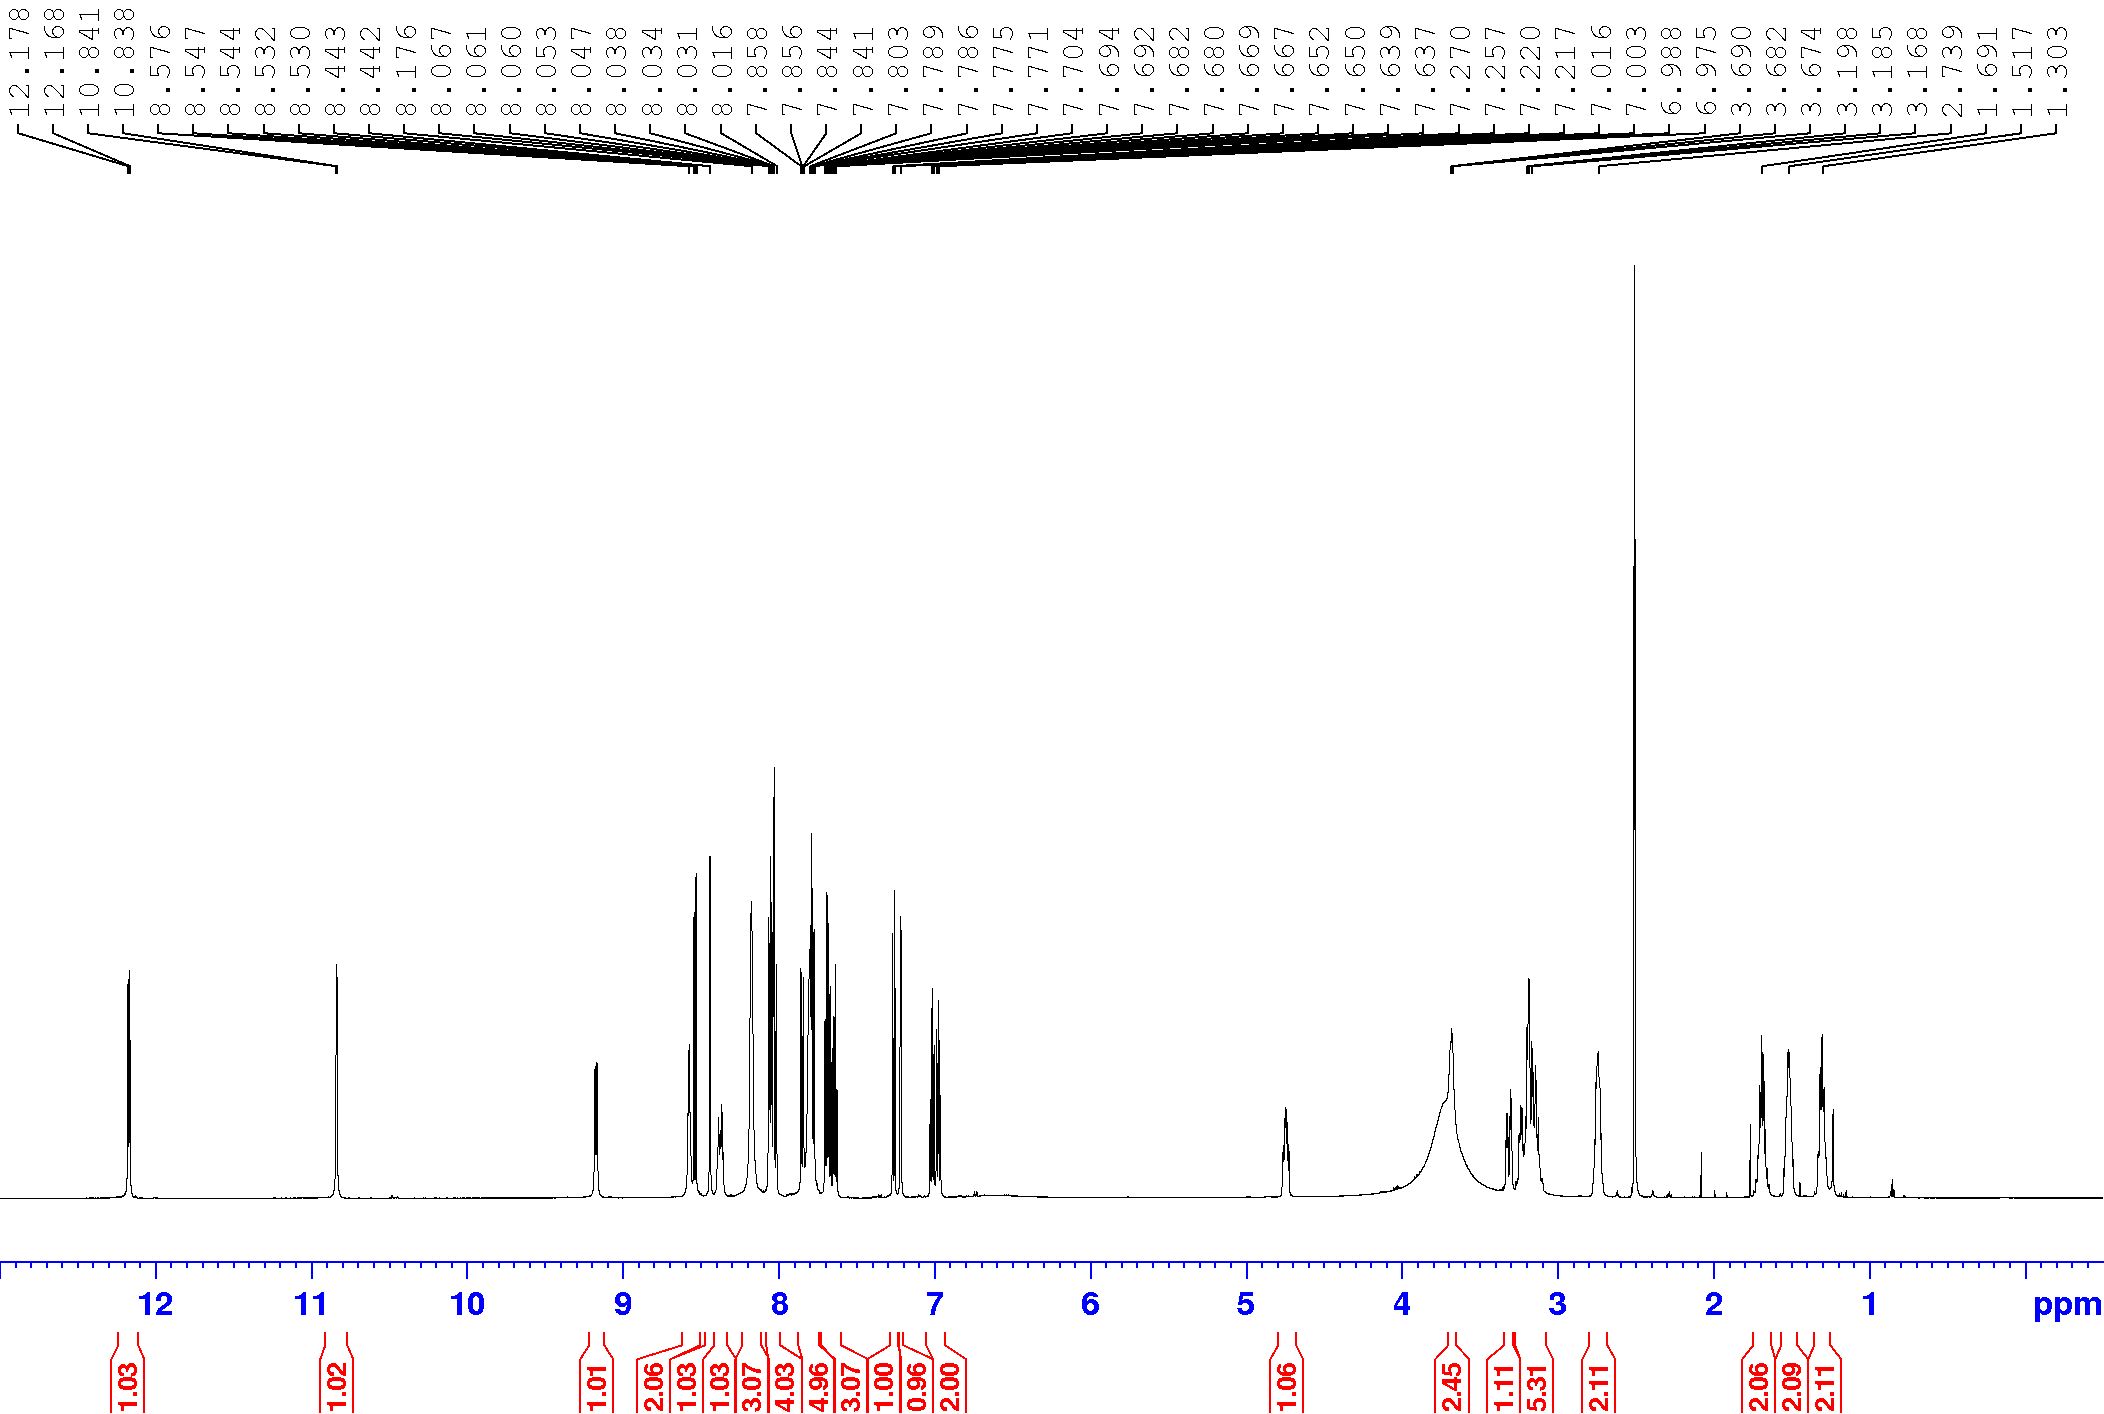


13C NMR of *N*-(4-bromo-2-(((S)-1-((2-((S)-2,6-diaminohexanamido)ethyl)amino)-3-(1*H*-indol-3-yl)-1-oxopropan-2-yl)carbamoyl)phenyl)-2-naphthamide (**15**)


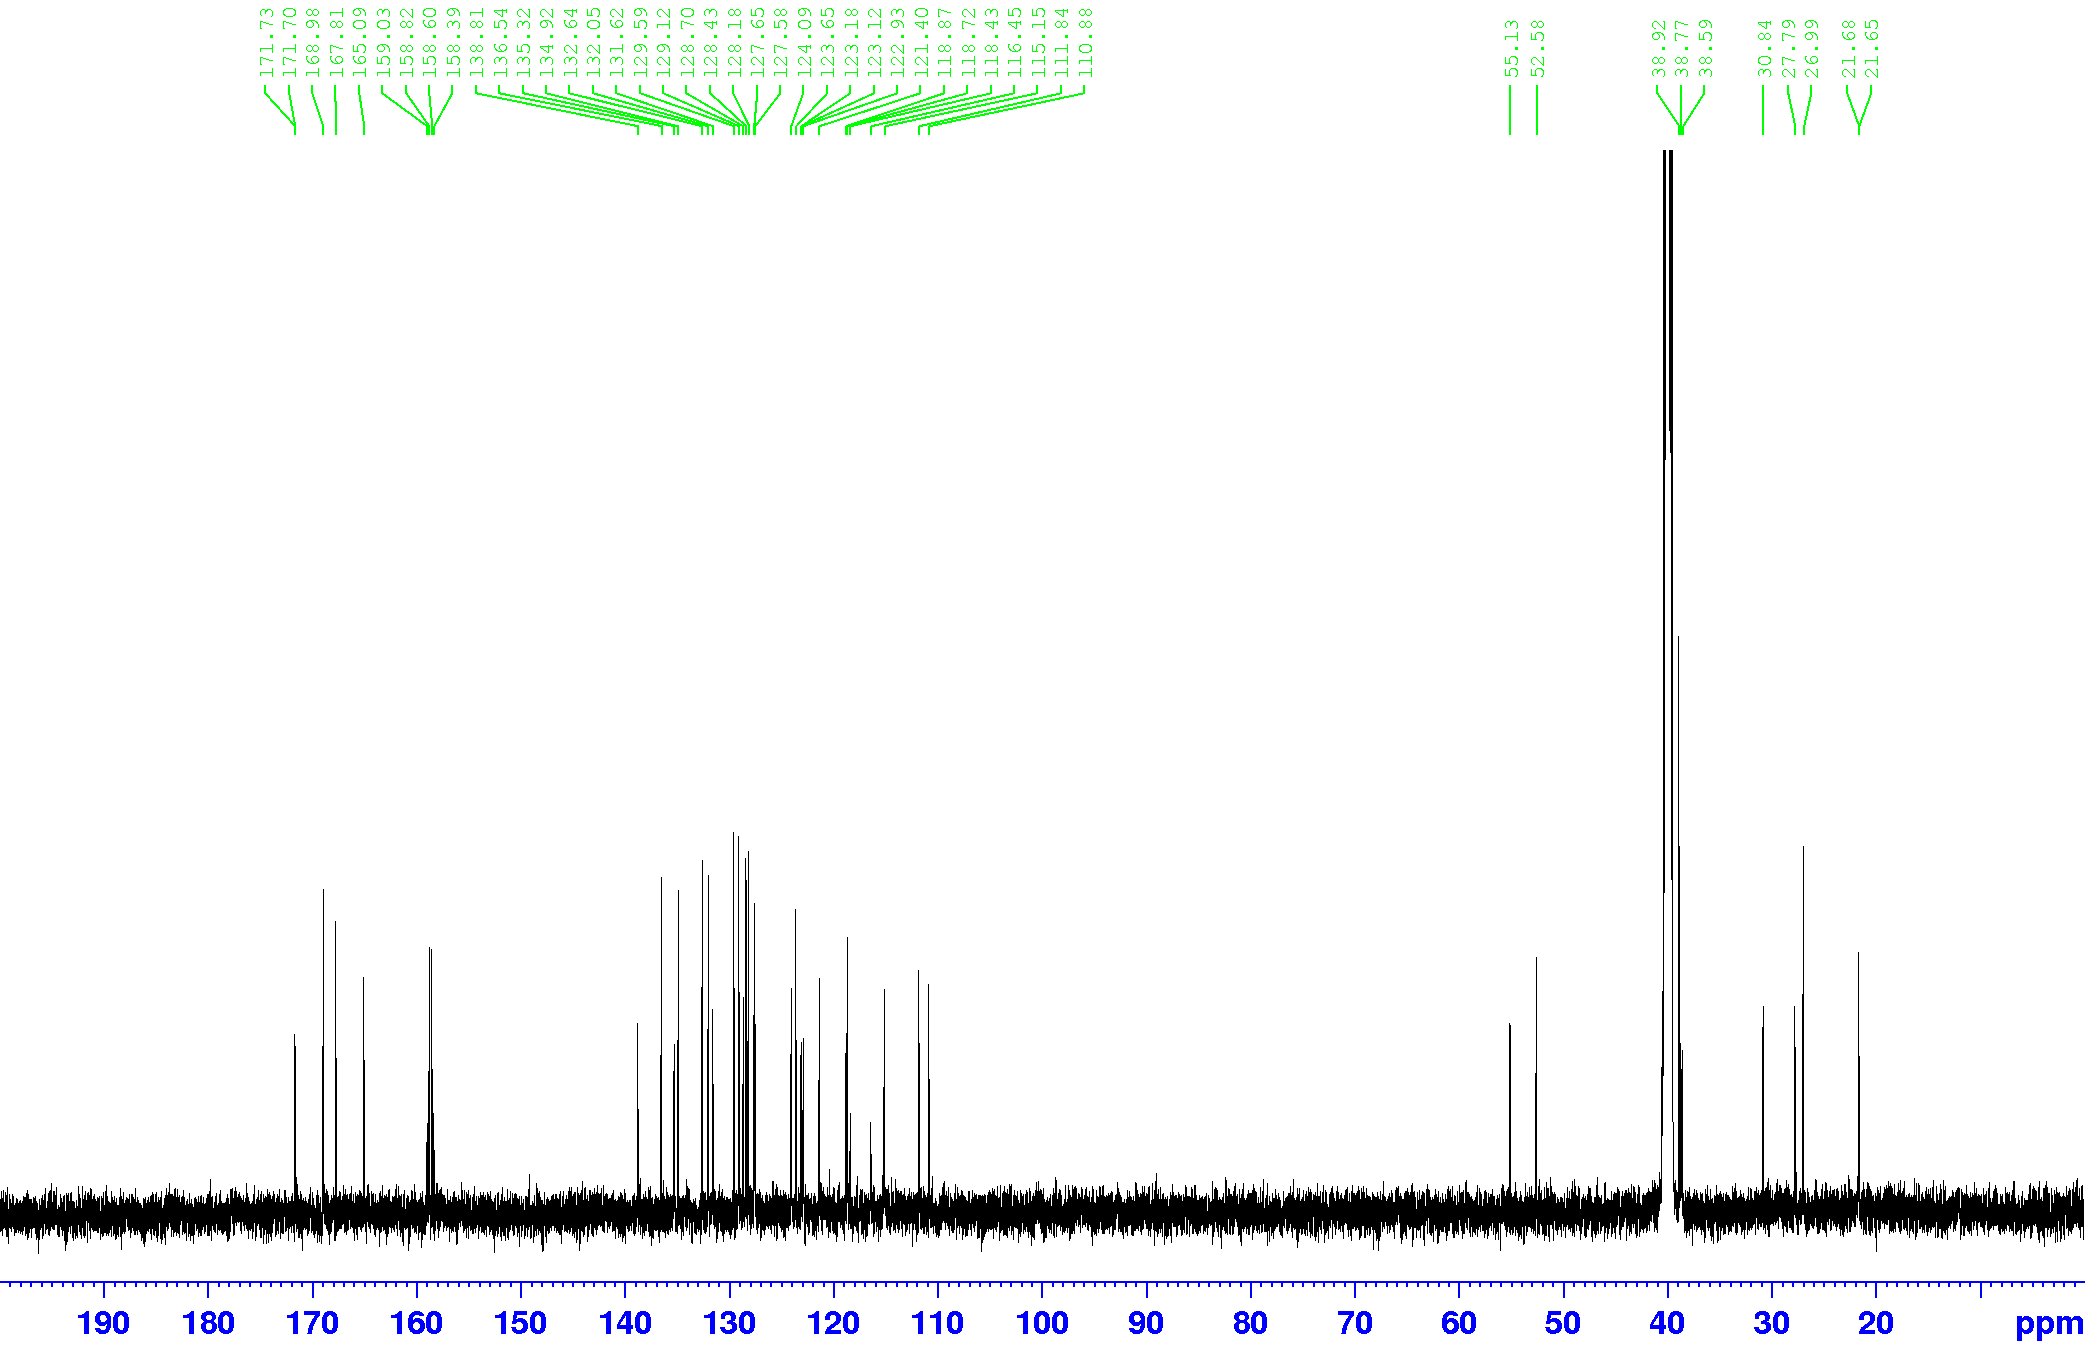


1HNMR of *N*-(4-bromo-2-(((S)-1-((2-((S)-2,6-diaminohexanamido)ethyl)amino)-3-(1*H*-indol-3-yl)-1-oxopropan-2-yl)carbamoyl)phenyl)-[1,1'-biphenyl]-3-carboxamide (**16**)


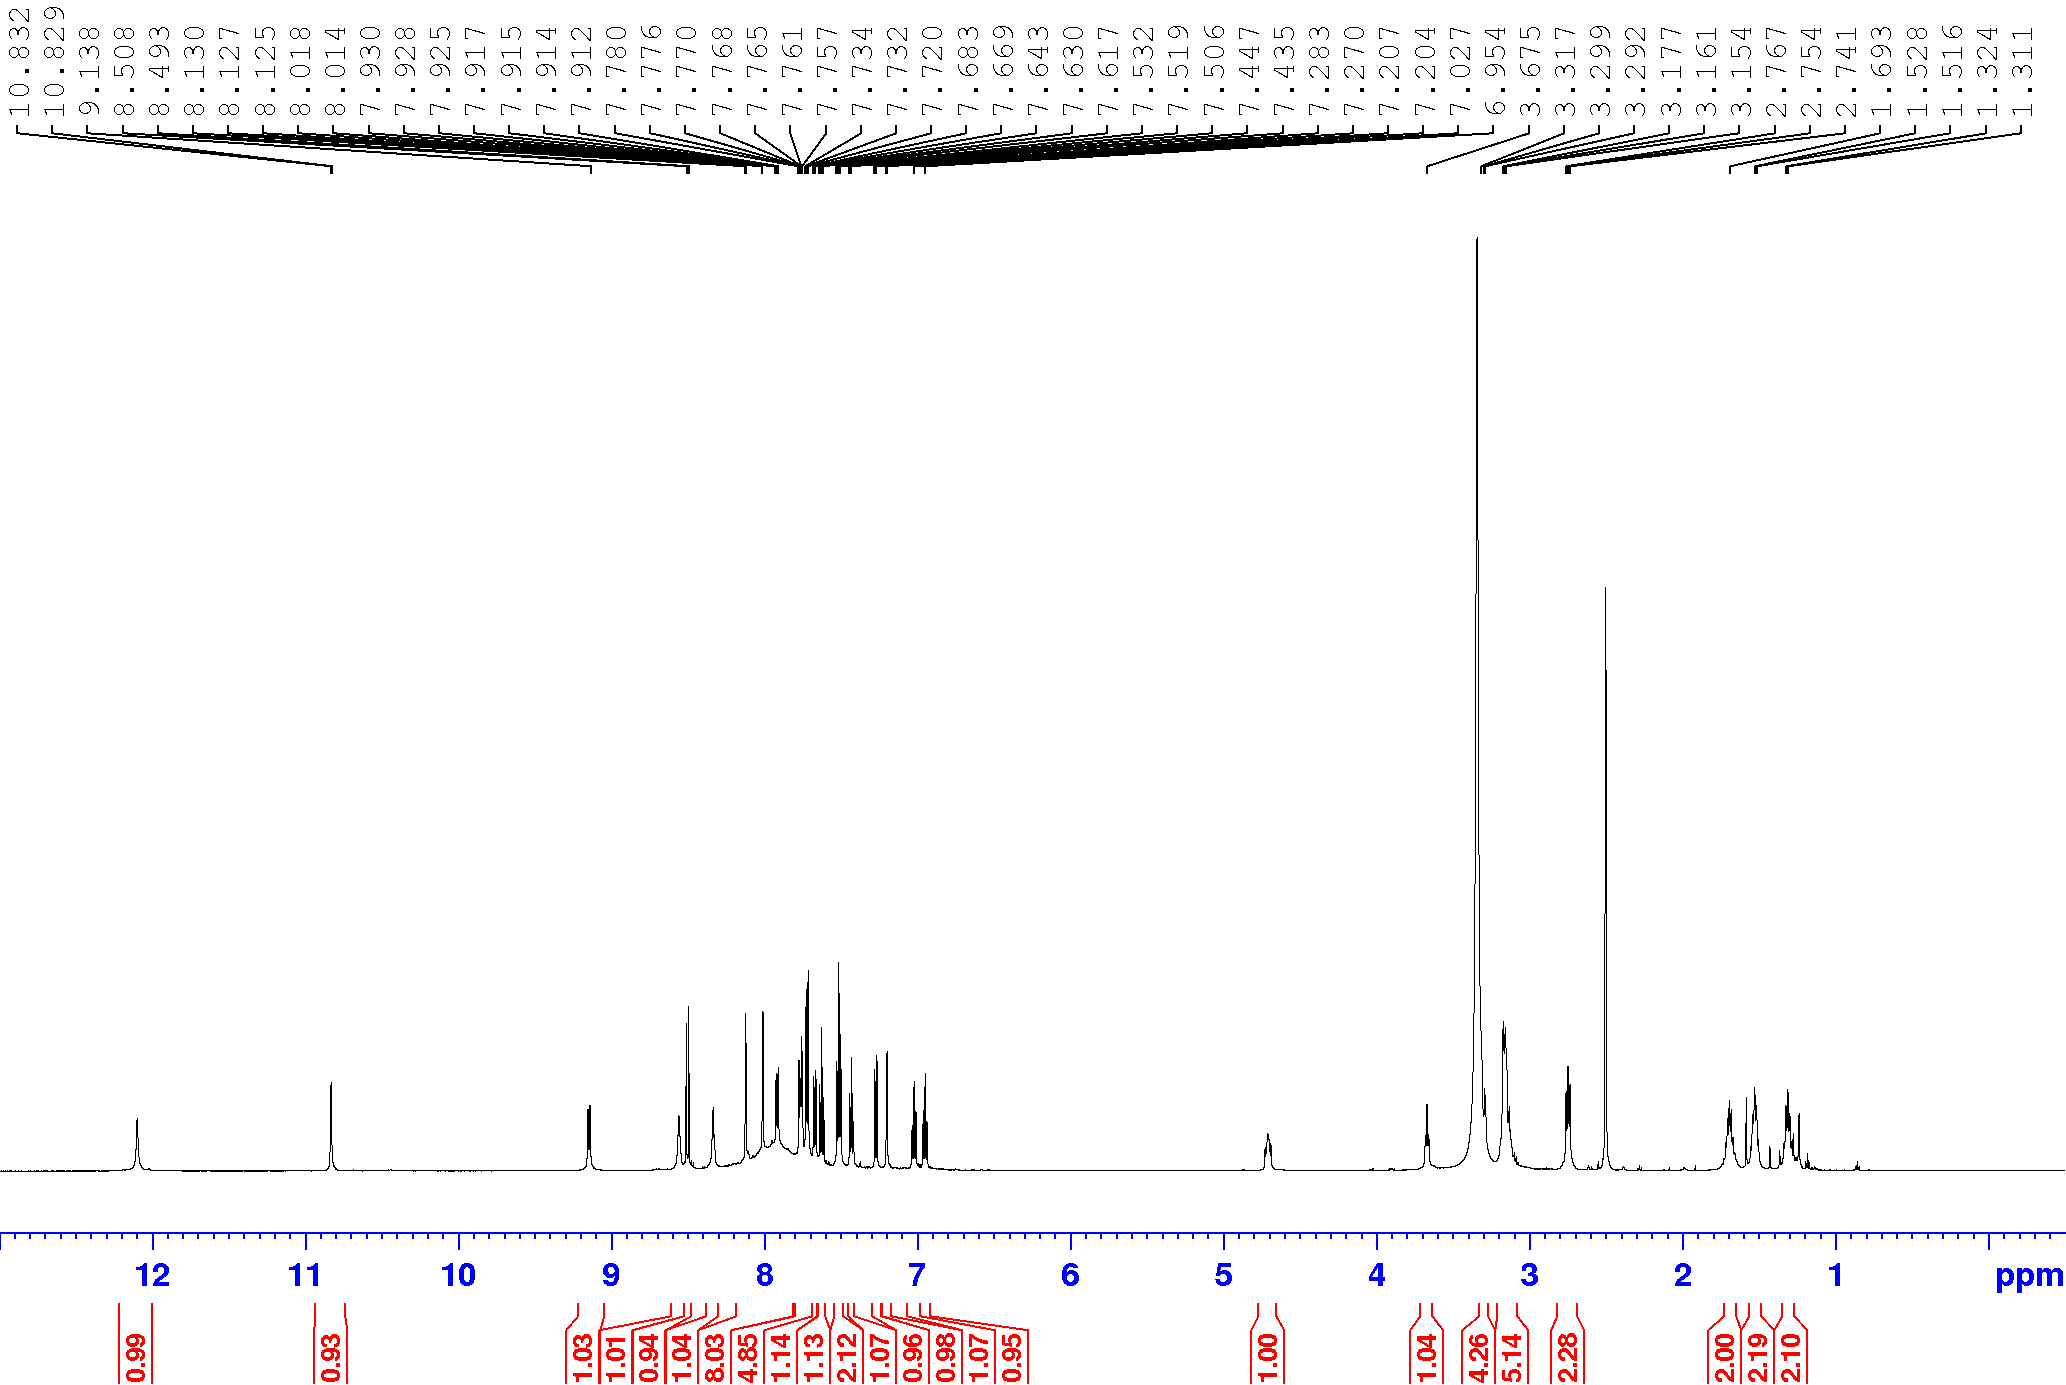


13C NMR of *N*-(4-bromo-2-(((S)-1-((2-((S)-2,6-diaminohexanamido)ethyl)amino)-3-(1*H*-indol-3-yl)-1-oxopropan-2-yl)carbamoyl)phenyl)-[1,1'-biphenyl]-3-carboxamide (**16**)


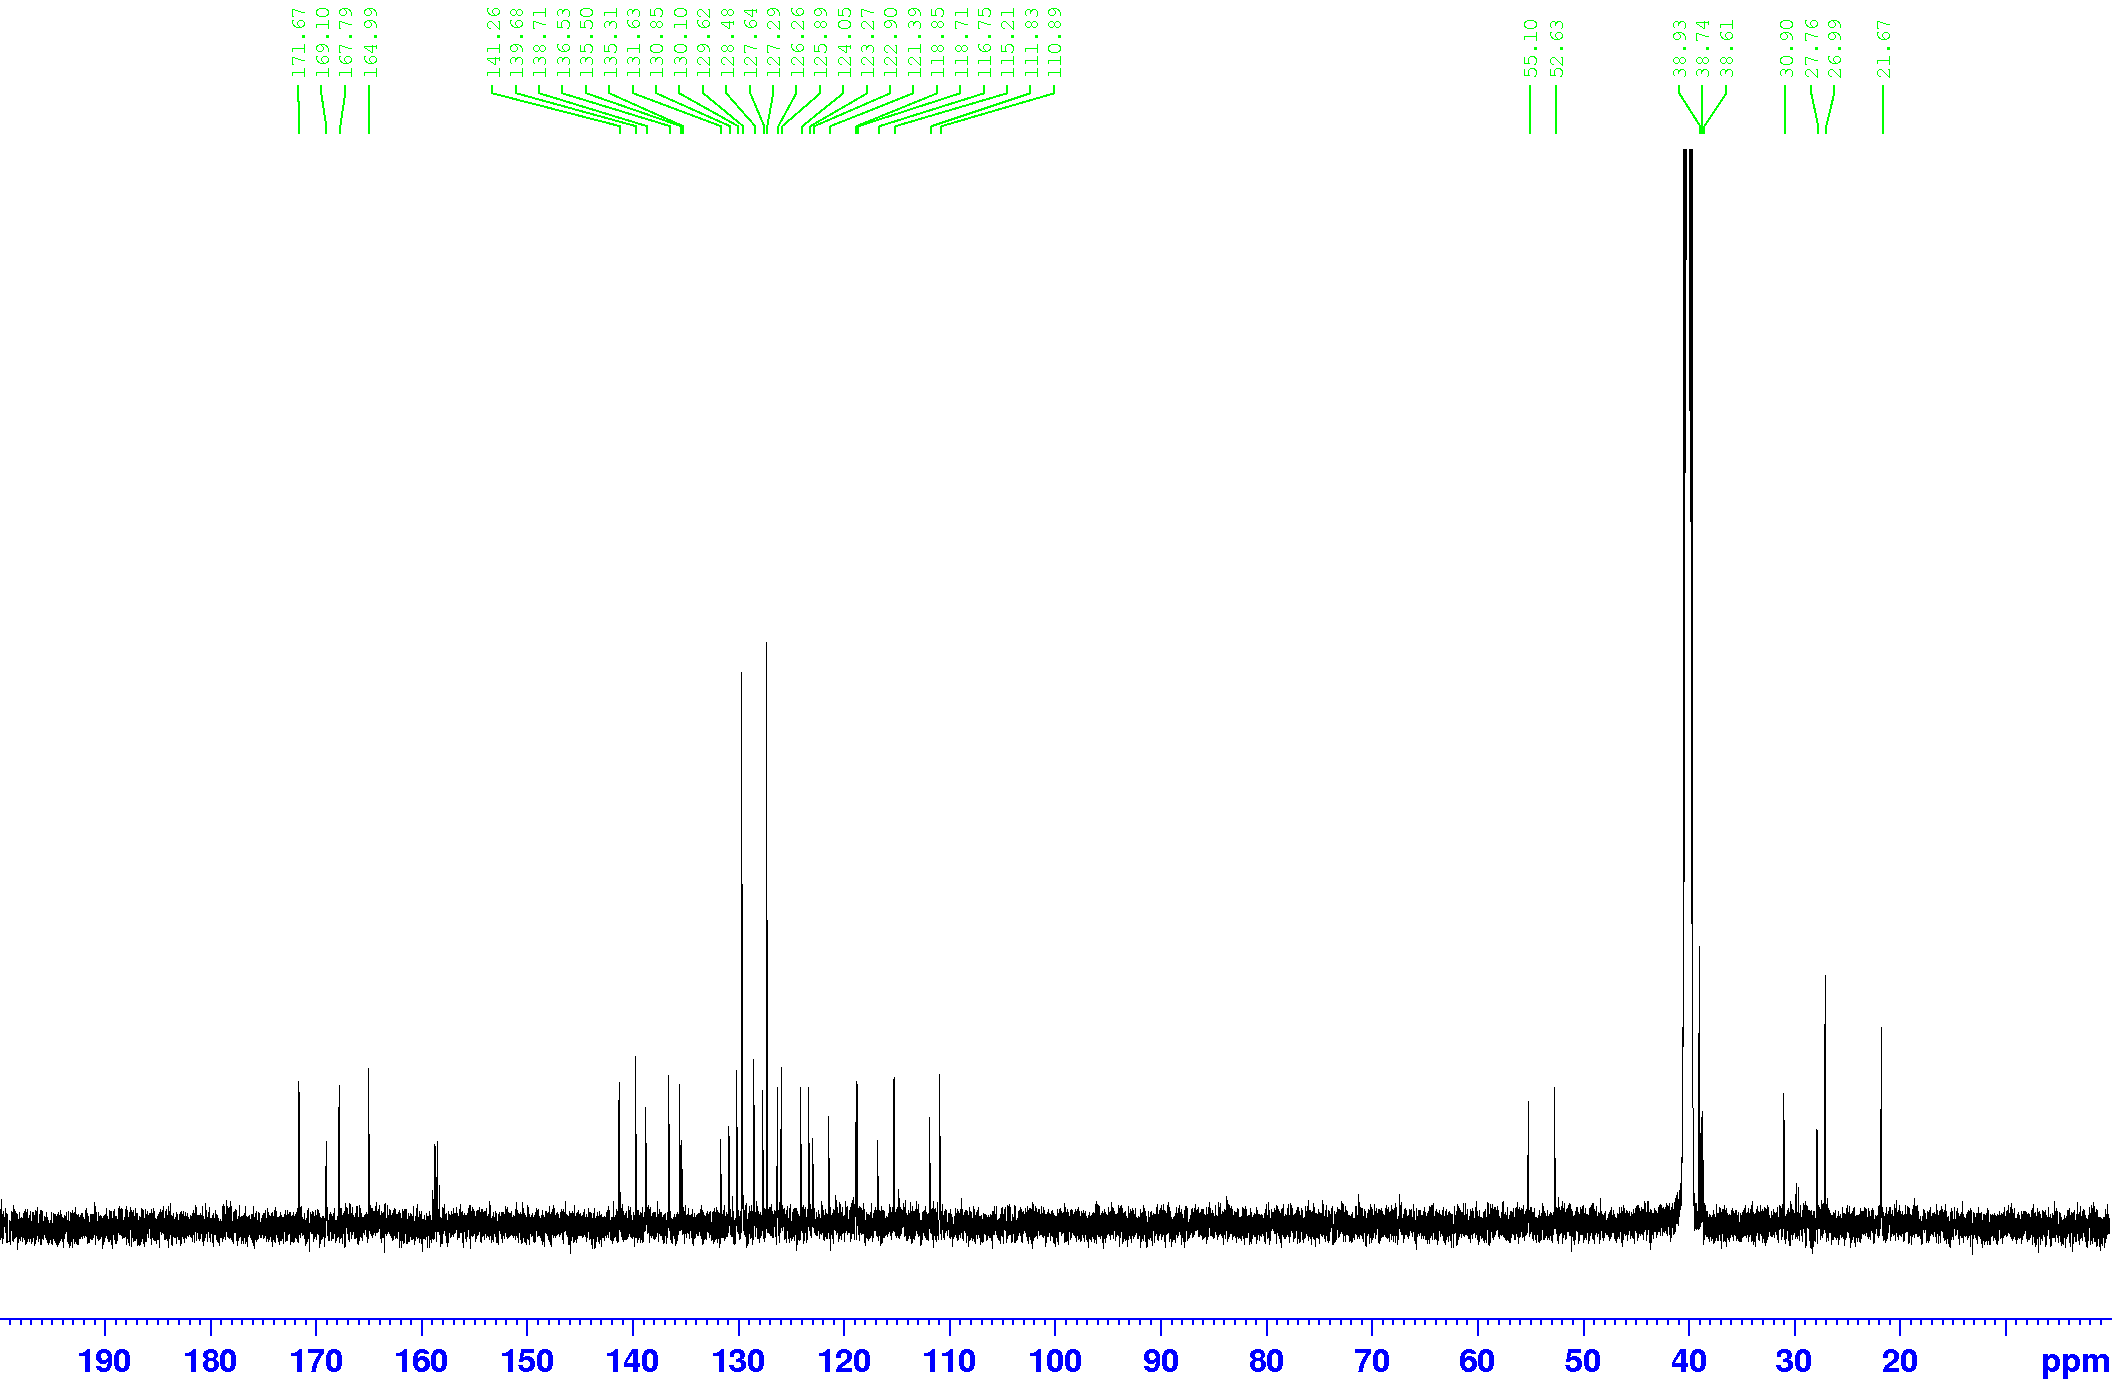


1H NMR of *N*-(4-bromo-2-(((S)-1-((2-((S)-2,6-diaminohexanamido)ethyl)amino)-3-(1*H*-indol-3-yl)-1-oxopropan-2-yl)carbamoyl)phenyl)-[1,1'-biphenyl]-4-carboxamide (**17**)


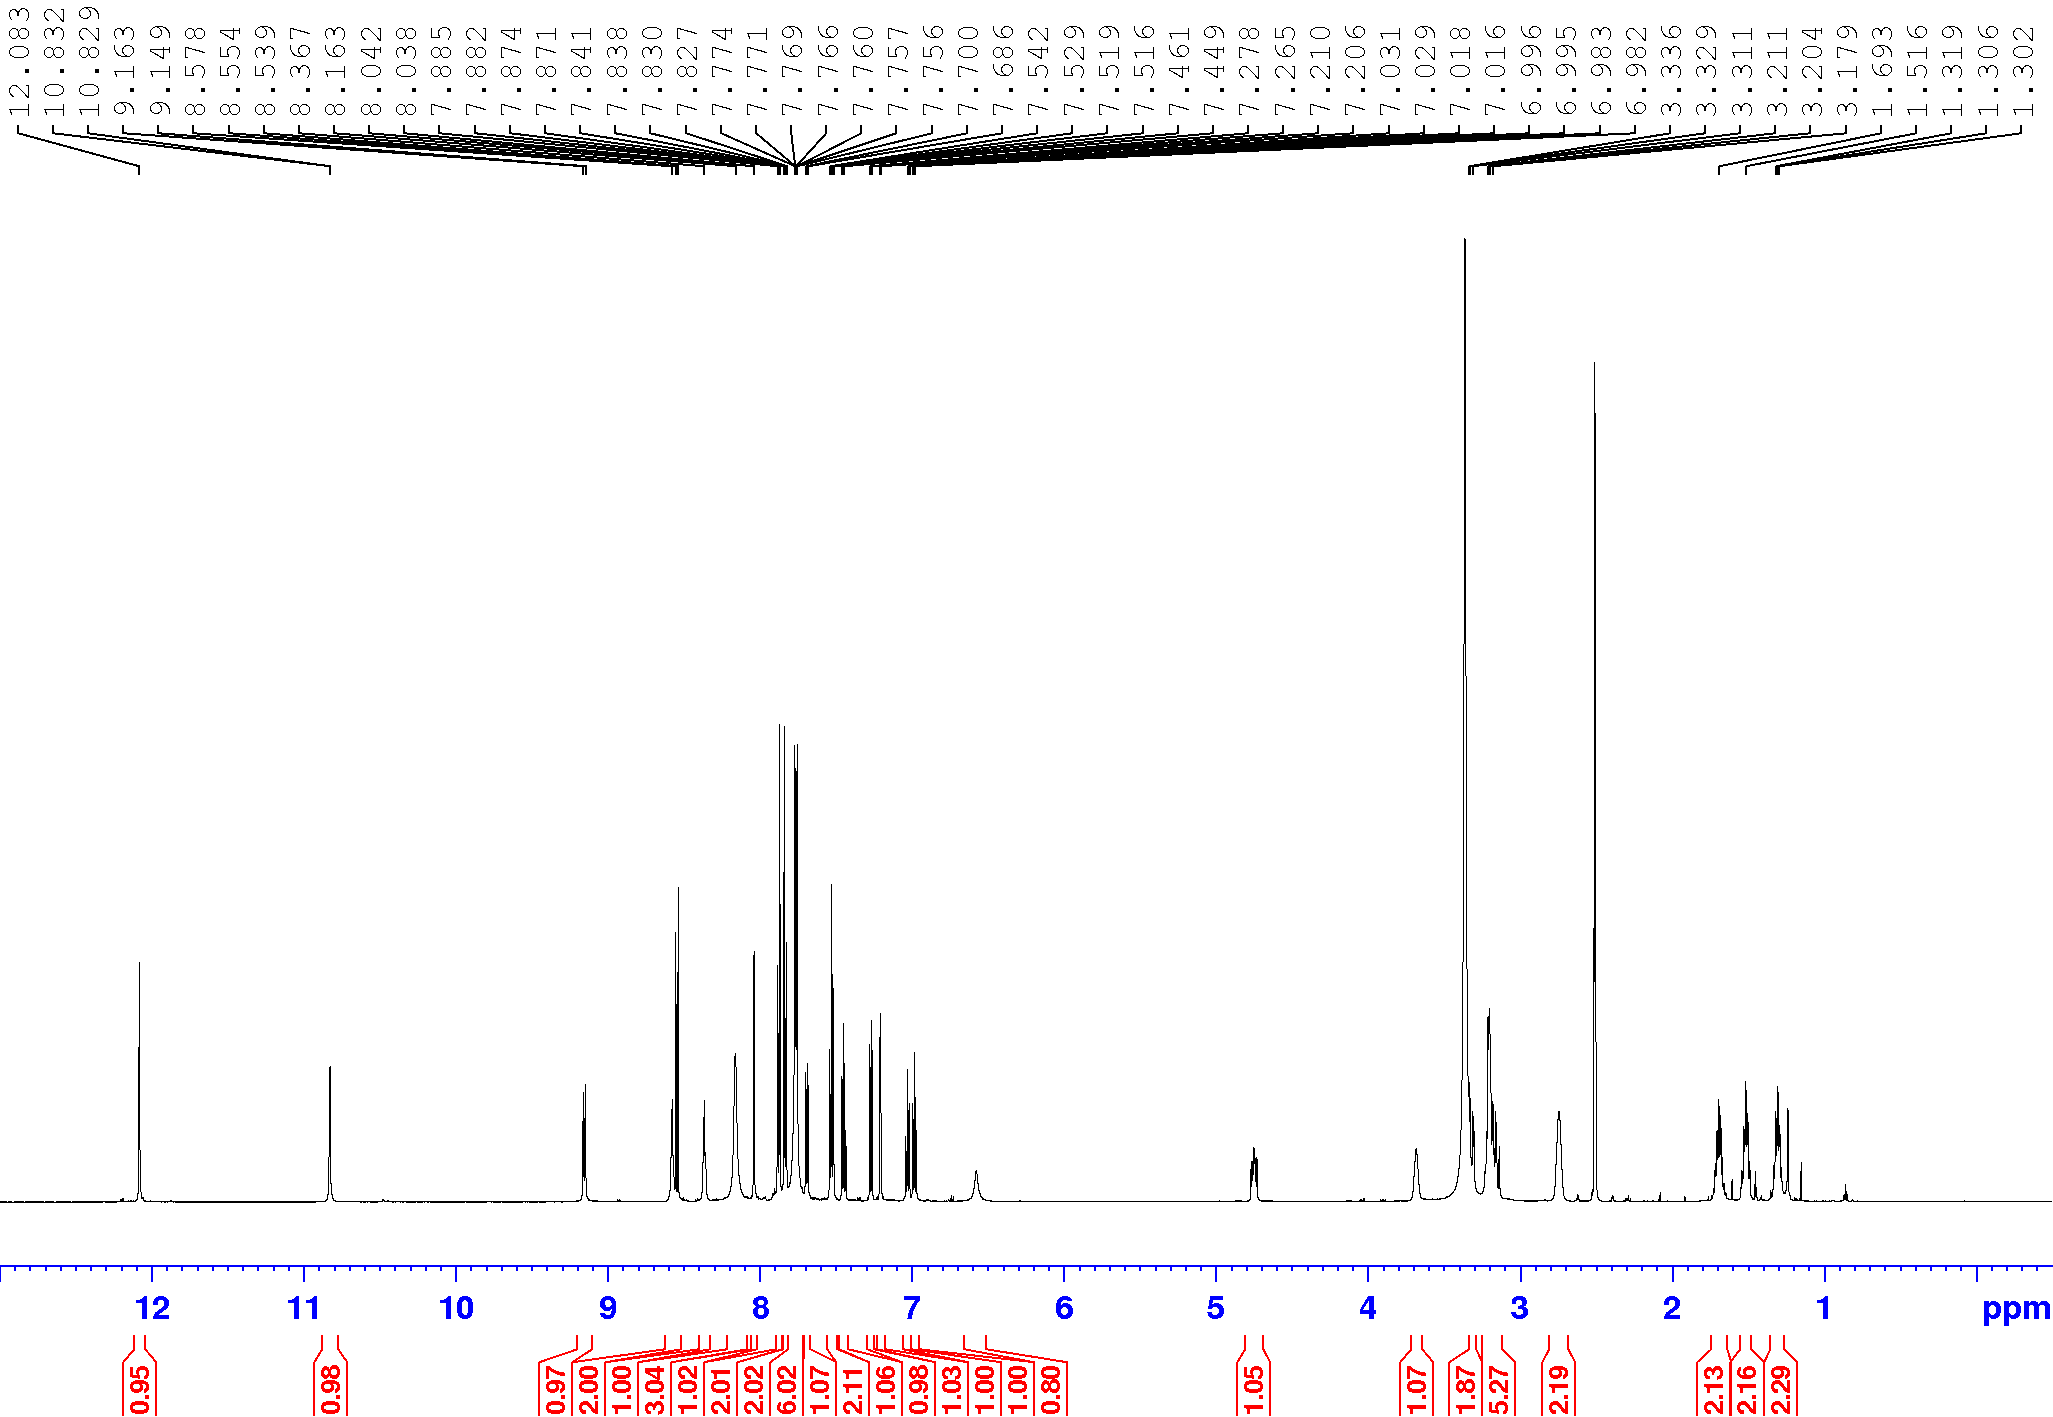


13C NMR of *N*-(4-bromo-2-(((S)-1-((2-((S)-2,6-diaminohexanamido)ethyl)amino)-3-(1*H*-indol-3-yl)-1-oxopropan-2-yl)carbamoyl)phenyl)-[1,1'-biphenyl]-4-carboxamide (**17**)


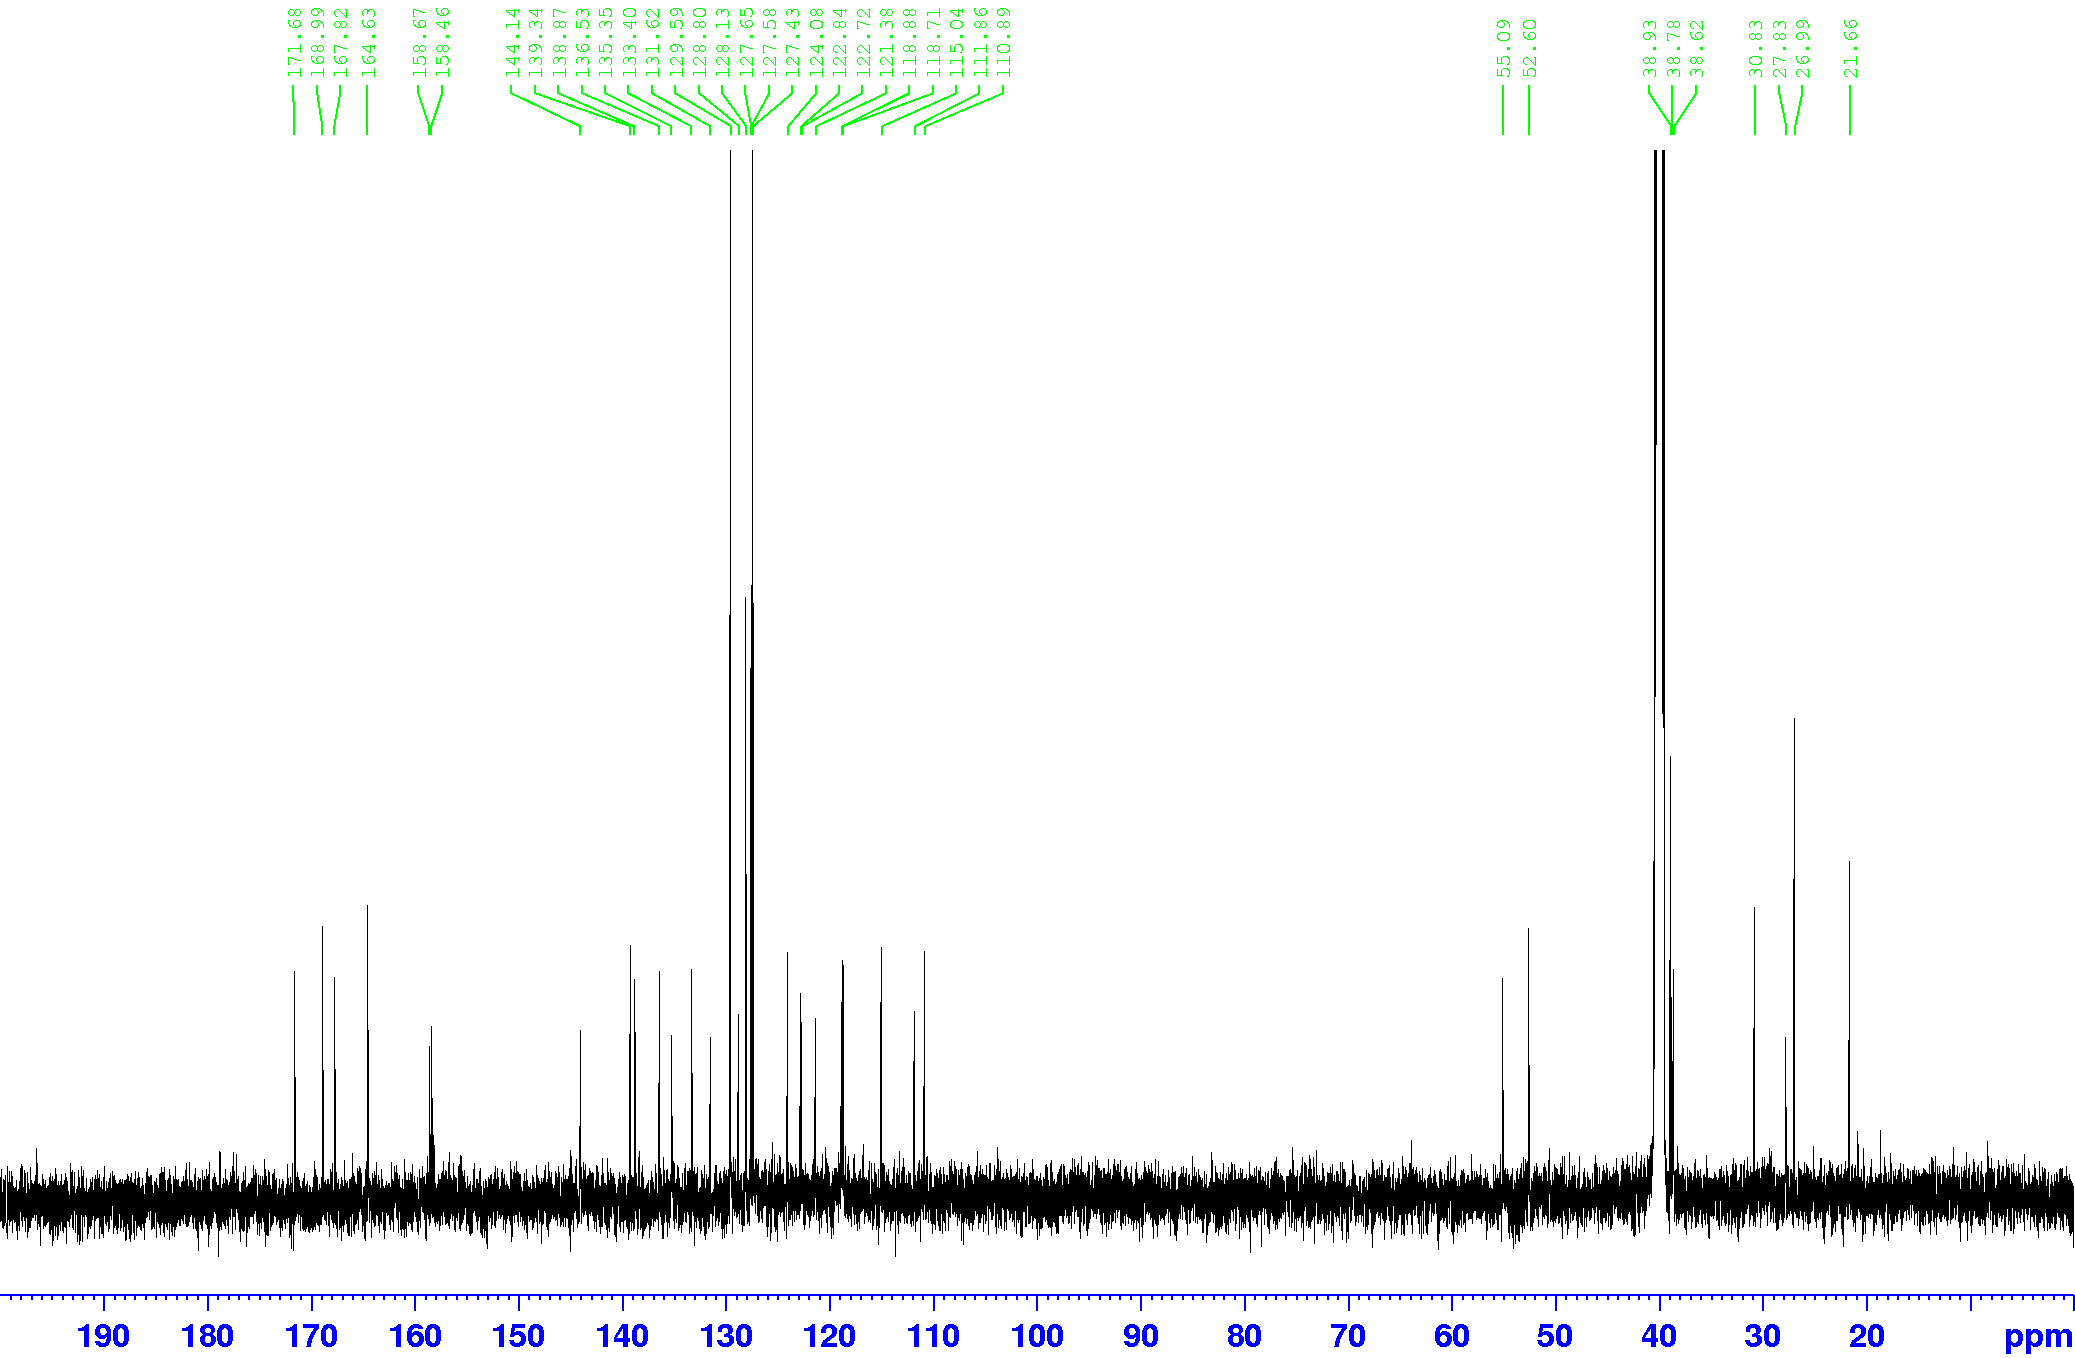

Supplement: Supplementary file 1 [file supplementary]
